# Supplementary material
Source: publisher figshare collection journal article supplement (https://acs.figshare.com/ndownloader/files/4689706)
Supplement: Supplementary file 1 [file 4689706]

# Organocatalytic and Highly Enantioselective Direct $\alpha$ -Amination of Aromatic Ketones

Tian-Yu Liu,<sup>†</sup> Hai-Lei Cui,<sup>†</sup> Yan Zhang,<sup>†</sup> Kun Jiang,<sup>†</sup> Wei Du,<sup>†</sup> Zhao-Quan He,<sup>†</sup> and Ying-Chun Chen\*<sup>†,‡</sup>

<sup>†</sup> Key Laboratory of Drug-Targeting of Education Ministry and Department of Medicinal Chemistry, West China School of Pharmacy, Sichuan University, Chengdu 610041, China, <sup>‡</sup> State Key Laboratory of Biotherapy, West China Hospital, Sichuan University, Chengdu, China.

E-mail: ycchenhuaxi@yahoo.com.cn

## Supporting Information

|                                                                |        |
|----------------------------------------------------------------|--------|
| 1. General methods.....                                        | S2     |
| 2. Asymmetric direct $\alpha$ -amination of aryl ketones ..... | S2-S7  |
| 3. NMR and HPLC spectra .....                                  | S8-S39 |

## 1. General Methods:

NMR spectra were recorded with tetramethylsilane as the internal standard. TLC was performed on glass-backed silica plates. Column chromatography was performed using silica gel (200-300 mesh) eluting with ethyl acetate and petroleum ether.  $^1\text{H}$  NMR spectra were recorded at 300 MHz, and  $^{13}\text{C}$  NMR spectra were recorded at 75 MHz (Bruker Avance). Chemical shifts ( $\delta$ ) are reported in ppm downfield from  $\text{CDCl}_3$  ( $\delta = 7.27$  ppm) for  $^1\text{H}$  NMR and relative to the central  $\text{CDCl}_3$  resonance ( $\delta = 77.0$  ppm) for  $^{13}\text{C}$  NMR spectroscopy. Coupling constants ( $J$ ) are given in Hz. ESI-HRMS spectrometer was measured with a Finnigan LCQ<sup>DECA</sup> ion trap mass spectrometer. Optical rotations were measured at 589 nm at 20 °C. Enantiomeric excess was determined by HPLC analysis on chiral Chiralpak columns. Commercial grade solvents were dried and purified by standard procedures as specified in Purification of Laboratory Chemicals, 4th Ed (Armarego, W. L. F.; Perrin, D. D. Butterworth Heinemann: 1997). Primary aminocatalysts **1d-1e** were prepared according to literature procedures.<sup>1</sup>

## 2. General procedure for primary amine catalyzed asymmetric Direct $\alpha$ -Amination of Aromatic Ketones

A number of reaction conditions have been investigated in the synthesis of racemic  $\alpha$ -amination products of aryl ketones. We could not obtain the desired products when various racemic  $\alpha$ -amino acids were used. Moreover, the combination of simple primary amine (benzylamine) and *p*-TSA also could not give the expected  $\alpha$ -amination products. Fortunately, we found that a strong organic base, tetramethylguanidine (TMG), could efficiently deproton aryl ketones and promote the  $\alpha$ -amination reaction with azodicarboxylates in quite high yields.

**General procedure for TMG catalyzed direct  $\alpha$ -amination of aromatic ketones:** TMG (tetramethylguanidine) (0.02 mmol, 20 mol %), aromatic ketones **2** (0.2 mmol) and DEAD (diethyl azodicarboxylates) **3a** (0.1 mmol) were stirred in dry DCM (0.5 mL) at 40 °C for 48 h. Then the product was purified by flash chromatography on silica gel to give the racemic product **4**.

**General procedure for primary amine catalyzed asymmetric reaction:** Catalyst **1e** (0.02 mmol, 20 mol %), additive (0.04 mmol, 40 mol %), aromatic ketones **2** (0.2 mmol), azodicarboxylates **3** (0.1 mmol) and 4Å MS (20 mg) were stirred in dry 2-PrOH (0.3 mL) at 40 °C for 72h. Then the product **4** was purified by flash chromatography on silica gel eluting with petroleum ether/EtOAc. The enantiomeric excess was determined by HPLC analysis on chiral column.

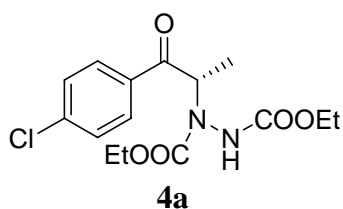

$R_f = 0.1$  (petroleum ether/EtOAc = 9:1); 76% yield; colorless oil;  $[\alpha]_D^{20} = -7.9$  ( $c = 0.35$  in EtOH); 98% ee, determined by HPLC analysis [Daicel chiralcel AS, *n*-hexane/*i*-PrOH = 70/30, 1.0 mL/min,  $\lambda = 254$  nm,  $t$  (major) = 6.93 min,  $t$  (minor) = 10.75 min];  $^1\text{H}$  NMR (300 MHz,  $\text{CDCl}_3$ ):  $\delta = 7.88$  (d,  $J = 8.0$  Hz, 2H), 7.44 (d,  $J = 8.3$  Hz, 2H), 6.86 (s, 1H), 5.81-5.74 (m, 1H), 4.23-4.09 (m, 4H); 1.45 (d,  $J = 7.1$  Hz, 3H), 1.28-1.21 (m, 6H) ppm;  $^{13}\text{C}$  NMR (75 MHz,  $\text{CDCl}_3$ ):  $\delta = 199.1, 198.6, 156.9, 156.3, 155.9, 140.1, 132.9, 130.0, 129.7, 129.1, 77.2, 62.9, 61.9, 59.0, 57.8, 38.9, 38.7, 29.6, 29.4, 22.9, 22.6, 14.8, 14.3, 14.1, 14.0$  ppm; ESI-HRMS: calcd. for  $\text{C}_{15}\text{H}_{19}\text{ClN}_2\text{O}_5 + \text{H}$  343.1055, found 343.1053.

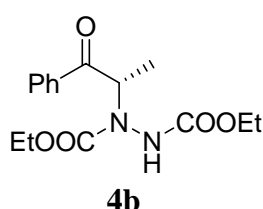

$R_f = 0.1$  (petroleum ether/EtOAc = 9:1); 65% yield; colorless oil;  $[\alpha]_D^{20} = -5.6$  ( $c = 0.36$  in EtOH);  $[\alpha]_D^{20} = +38.6$  ( $c = 0.58$  in  $\text{CHCl}_3$ ) [lit.:<sup>2</sup>  $[\alpha]_D^{24} = -31.2$  ( $c = 2.795$  in  $\text{CHCl}_3$ ), 84% ee, *R*-isomer]; 94% ee, determined by HPLC analysis [Daicel chiralcel AS, *n*-hexane/*i*-PrOH = 70/30, 1.0 mL/min,  $\lambda = 254$  nm,  $t$  (major) = 7.14 min,  $t$  (minor) = 10.40 min];  $^1\text{H}$  NMR (300 MHz,  $\text{CDCl}_3$ ):  $\delta = 7.93$  (d,  $J = 7.6$  Hz, 2H), 7.60 (t,  $J = 7.2$  Hz, 1H), 7.48 (t,  $J = 7.5$  Hz, 2H), 6.88 (s, 1H), 5.86-5.84 (m, 1H), 4.26-4.17 (m, 4H); 1.48 (d,  $J = 6.8$  Hz, 3H), 1.33-1.20 (m, 6H) ppm;  $^{13}\text{C}$  NMR (75 MHz,  $\text{CDCl}_3$ ):  $\delta = 200.6, 157.0, 156.5, 156.3, 156.1, 134.5, 133.7, 133.3, 130.0, 129.6, 128.8, 128.5, 128.4, 128.3, 77.2, 68.7, 67.9, 62.8, 62.0, 61.9, 59.1, 58.0, 25.6, 25.3, 14.9, 14.5, 14.4$  ppm; ESI-HRMS: calcd. for  $\text{C}_{15}\text{H}_{20}\text{N}_2\text{O}_5 + \text{H}$  309.1445, found 309.1449.

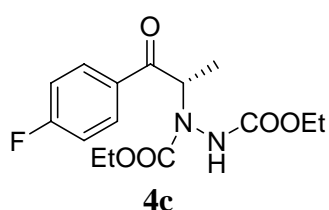

$R_f = 0.1$  (petroleum ether/EtOAc = 9:1); 52% yield; colorless oil;  $[\alpha]_D^{20} = -10.8$  ( $c = 0.33$  in EtOH); 93% ee, determined by HPLC analysis [Daicel chiralcel AS, *n*-hexane/*i*-PrOH = 70/30, 1.0 mL/min,  $\lambda = 254$  nm,  $t$  (major) = 7.02 min,  $t$  (minor) = 11.33 min];  $^1\text{H}$  NMR (300 MHz,  $\text{CDCl}_3$ ):  $\delta = 7.97$  (d,  $J = 5.4$  Hz, 2H), 7.15 (t,  $J = 8.5$  Hz, 2H), 6.85 (s, 1H), 5.81-5.76 (m, 1H), 4.25-4.10 (m, 4H); 1.47 (d,  $J = 6.9$  Hz, 3H), 1.33-1.23 (m, 6H) ppm;  $^{13}\text{C}$  NMR (75 MHz,  $\text{CDCl}_3$ ):  $\delta = 198.8, 166.0$  (d,  $^1J_{\text{C},\text{F}} = 254.4$  Hz), 156.9, 156.4, 132.3, 131.2 (d,  $^3J_{\text{C},\text{F}} = 9.2$  Hz), 116.0 (d,  $^2J_{\text{C},\text{F}} = 21.8$  Hz), 115.4, 77.2, 68.7, 62.9, 62.0, 58.9, 57.8, 29.7, 27.0, 25.3, 14.9, 14.4, 14.3 ppm; ESI-HRMS: calcd. for  $\text{C}_{15}\text{H}_{19}\text{FN}_2\text{O}_5 + \text{H}$  327.1351, found 327.1353.

$R_f = 0.1$  (petroleum ether/EtOAc = 10:1); 62% yield; colorless oil;  $[\alpha]_D^{20} = 8.9$  ( $c = 0.29$  in EtOH); 97% ee, determined by HPLC analysis [Daicel chiralcel AS, *n*-hexane/*i*-PrOH = 70/30, 1.0

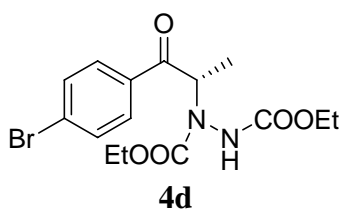

mL/min,  $\lambda$  = 254 nm, t (major) = 7.38 min, t (minor) = 11.20 min];  $^1\text{H}$  NMR (300 MHz,  $\text{CDCl}_3$ ):  $\delta$  = 7.80 (d,  $J$  = 7.3 Hz, 2H), 7.62 (d,  $J$  = 8.2 Hz, 2H), 6.83 (s, 1H), 5.78-5.76 (m, 1H), 4.21-4.10 (m, 4H); 1.45 (d,  $J$  = 6.9 Hz, 3H), 1.29-1.16 (m, 6H) ppm;  $^{13}\text{C}$  NMR (75 MHz,  $\text{CDCl}_3$ ):  $\delta$  = 199.4, 198.8, 156.9, 156.3, 133.3, 132.1, 131.8, 131.1, 130.0, 129.8, 128.9, 77.2, 62.9, 62.3, 62.0, 59.0, 57.8, 31.5, 29.7, 24.1, 22.6, 14.8, 14.4, 14.3, 14.2 ppm; ESI-HRMS: calcd. for  $\text{C}_{15}\text{H}_{19}\text{BrN}_2\text{O}_5 + \text{H}$  387.0550, found 387.0547.

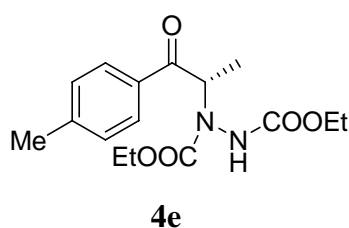

$R_f$  = 0.1 (petroleum ether/EtOAc = 9:1); 62% yield; colorless oil;  $[\alpha]_{\text{D}}^{20}$  = 6.7 ( $c$  = 0.32 in EtOH); 94% ee, determined by HPLC analysis [Daicel chiralcel AS,  $n$ -hexane/ $i$ -PrOH = 70/30, 1.0 mL/min,  $\lambda$  = 254 nm, t (major) = 6.49 min, t (minor) = 9.37 min];  $^1\text{H}$  NMR (300 MHz,  $\text{CDCl}_3$ ):  $\delta$  = 7.83 (d,  $J$  = 7.1 Hz, 2H), 7.27 (d,  $J$  = 8.1 Hz, 2H), 6.91 (s, 1H), 5.83-5.81 (m, 1H), 4.24-4.17 (m, 4H), 2.42 (s, 3H), 1.47 (d,  $J$  = 6.7 Hz, 3H), 1.30-1.23 (m, 6H) ppm;  $^{13}\text{C}$  NMR (75 MHz,  $\text{CDCl}_3$ ):  $\delta$  = 200.2, 156.5, 144.7, 134.4, 132.0, 129.5, 129.2, 128.6, 62.8, 61.9, 59.0, 57.9, 29.7, 21.7, 15.1, 14.7, 14.4, 14.3 ppm; ESI-HRMS: calcd. for  $\text{C}_{16}\text{H}_{22}\text{N}_2\text{O}_5 + \text{H}$  323.1601, found 323.1605.

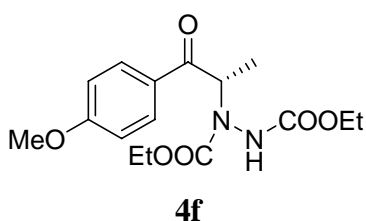

$R_f$  = 0.1 (petroleum ether/EtOAc = 7:1); 77% yield; colorless oil;  $[\alpha]_{\text{D}}^{20}$  = 8.1 ( $c$  = 0.37 in EtOH); 94% ee, determined by HPLC analysis [Daicel chiralcel AS,  $n$ -hexane/ $i$ -PrOH = 70/30, 1.0 mL/min,  $\lambda$  = 254 nm, t (major) = 8.67 min, t (minor) = 13.95 min];  $^1\text{H}$  NMR (300 MHz,  $\text{CDCl}_3$ ):  $\delta$  = 7.92 (d,  $J$  = 7.6 Hz, 2H), 6.95 (d,  $J$  = 8.8 Hz, 2H), 6.43 (s, 1H), 5.81-5.79 (m, 1H), 4.35-4.15 (m, 4H), 3.87 (s, 3H), 1.48 (d,  $J$  = 7.0 Hz, 3H), 1.35-1.25 (m, 6H) ppm;  $^{13}\text{C}$  NMR (75 MHz,  $\text{CDCl}_3$ ):  $\delta$  = 199.1, 163.9, 156.5, 156.3, 130.9, 130.7, 127.3, 114.0, 113.7, 77.2, 62.8, 62.5, 62.3, 61.8, 58.7, 57.6, 55.5, 29.7, 15.2, 14.8, 14.4, 14.1 ppm; ESI-HRMS: calcd. for  $\text{C}_{16}\text{H}_{22}\text{N}_2\text{O}_6 + \text{H}$  339.1551, found 339.1549.

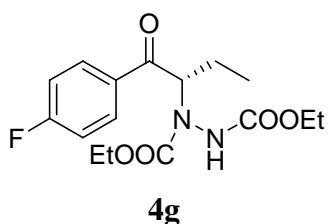

$R_f$  = 0.1 (petroleum ether/EtOAc = 9:1); 77% yield; colorless oil;  $[\alpha]_{\text{D}}^{20}$  = 4.8 ( $c$  = 0.42 in EtOH); 96% ee, determined by HPLC analysis [Daicel chiralcel AS,  $n$ -hexane/ $i$ -PrOH = 70/30, 1.0 mL/min,  $\lambda$  = 254 nm, t (major) = 5.39 min, t (minor) = 9.74 min];  $^1\text{H}$  NMR (300 MHz,  $\text{CDCl}_3$ ):  $\delta$  = 7.95 (br.s, 2H), 7.14 (t,  $J$  = 8.5 Hz, 2H), 6.86 (br.s, 1H), 5.58-5.56 (m, 1H), 4.27-4.07 (m, 4H), 1.86-1.78 (m, 2H), 1.35-1.18 (m, 6H), 1.10 (t,  $J$  = 7.3 Hz,

3H) ppm;  $^{13}\text{C}$  NMR (75 MHz,  $\text{CDCl}_3$ ):  $\delta$  = 198.8, 165.9 (d,  $^1J_{\text{C,F}}$  = 254.3 Hz), 156.6, 156.0, 131.6, 131.1 (d,  $^3J_{\text{C,F}}$  = 9.2 Hz), 116.0 (d,  $^2J_{\text{C,F}}$  = 21.8 Hz), 77.2, 64.5, 64.0, 63.4, 63.0, 61.9, 31.9, 29.6, 29.3, 22.5, 22.1, 14.3, 14.1, 11.3 ppm; ESI-HRMS: calcd. for  $\text{C}_{16}\text{H}_{21}\text{FN}_2\text{O}_5 + \text{H}$  341.1507, found 341.1503.

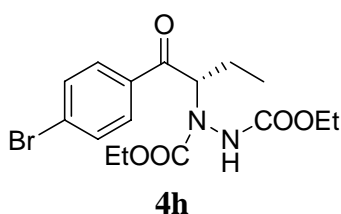

$R_f$  = 0.1 (petroleum ether/EtOAc = 12:1); 54% yield; colorless oil;  $[\alpha]_{\text{D}}^{20}$  = -14.0 ( $c$  = 0.37 in EtOH); 99% ee, determined by HPLC analysis [Daicel chiralcel AS,  $n$ -hexane/ $i$ -PrOH = 70/30, 1.0 mL/min,  $\lambda$  = 254 nm,  $t$  (major) = 6.35 min,  $t$  (minor) = 11.02 min];  $^1\text{H}$  NMR (300 MHz,  $\text{CDCl}_3$ ):  $\delta$  = 7.79 (br.s, 2H), 7.62 (d,  $J$  = 8.4 Hz, 2H), 6.80 (br.s, 1H), 5.56 (br.s, 1H), 4.20-4.17 (m, 4H), 1.86-1.82 (m, 2H), 1.29-1.23 (m, 6H), 1.10 (t,  $J$  = 7.3 Hz, 3H) ppm;  $^{13}\text{C}$  NMR (75 MHz,  $\text{CDCl}_3$ ):  $\delta$  = 199.3, 156.9, 156.0, 136.4, 134.0, 132.1, 131.8, 131.3, 130.4, 129.9, 128.9, 77.2, 67.9, 64.6, 64.0, 63.4, 63.0, 61.9, 29.7, 25.6, 22.4, 22.0, 14.4, 11.2 ppm; ESI-HRMS: calcd. for  $\text{C}_{16}\text{H}_{21}\text{BrN}_2\text{O}_5 + \text{Na}$  423.0526, found 423.0530.

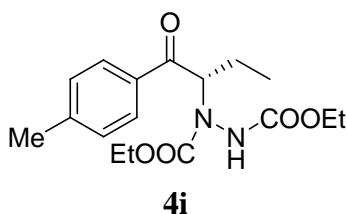

$R_f$  = 0.1 (petroleum ether/EtOAc = 12:1); 49% yield; colorless oil;  $[\alpha]_{\text{D}}^{20}$  = 6.0 ( $c$  = 0.30 in EtOH); 98% ee, determined by HPLC analysis [Daicel chiralcel AS,  $n$ -hexane/ $i$ -PrOH = 70/30, 1.0 mL/min,  $\lambda$  = 254 nm,  $t$  (major) = 6.18 min,  $t$  (minor) = 9.78 min];  $^1\text{H}$  NMR (300 MHz,  $\text{CDCl}_3$ ):  $\delta$  = 7.81 (br.s, 2H), 7.27 (d,  $J$  = 7.8 Hz, 2H), 6.92 (s, 1H), 5.60-5.59 (m, 1H), 4.27-4.12 (m, 4H), 2.41 (s, 3H), 1.88-1.82 (m, 2H), 1.29-1.19 (m, 6H), 1.11 (t,  $J$  = 7.3 Hz, 3H) ppm;  $^{13}\text{C}$  NMR (75 MHz,  $\text{CDCl}_3$ ):  $\delta$  = 200.2, 157.0, 156.7, 156.1, 144.6, 134.4, 132.7, 130.0, 129.5, 129.2, 129.1, 128.5, 77.2, 64.8, 63.8, 62.9, 61.8, 31.6, 29.6, 29.5, 29.3, 22.6, 22.3, 22.0, 21.8, 21.7, 21.3, 14.3, 14.1, 11.4 ppm; ESI-HRMS: calcd. for  $\text{C}_{17}\text{H}_{24}\text{N}_2\text{O}_5 + \text{H}$  337.1758, found 337.1756.

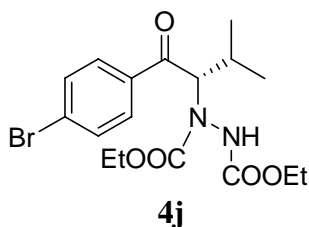

$R_f$  = 0.1 (petroleum ether/EtOAc = 15:1); 52% yield; colorless oil;  $[\alpha]_{\text{D}}^{20}$  = -3.4 ( $c$  = 0.23 in EtOH); 97% ee, determined by HPLC analysis [Daicel chiralcel AS,  $n$ -hexane/ $i$ -PrOH = 70/30, 1.0 mL/min,  $\lambda$  = 254 nm,  $t$  (major) = 8.28 min,  $t$  (minor) = 14.94 min];  $^1\text{H}$  NMR (300 MHz,  $\text{CDCl}_3$ ):  $\delta$  = 7.89 (br.s, 2H), 7.62 (d,  $J$  = 8.6 Hz, 2H), 6.60 (br.s, 1H), 5.36 (br.s, 1H), 4.21-4.15 (m, 4H), 2.40 (br.s, 1H), 1.24 (t,  $J$  = 7.1 Hz, 6H), 1.06 (d,  $J$  = 6.3 Hz, 3H), 0.87 (d,  $J$  = 6.7 Hz, 3H) ppm;  $^{13}\text{C}$  NMR (75 MHz,  $\text{CDCl}_3$ ):  $\delta$  = 155.6, 135.7, 132.1, 130.1, 128.8, 77.2, 65.7, 64.5, 63.2, 62.0, 27.3, 19.6, 18.7, 14.4 ppm; ESI-HRMS: calcd. for

C<sub>17</sub>H<sub>23</sub>BrN<sub>2</sub>O<sub>5</sub>+H 415.0863, found 415.0846.

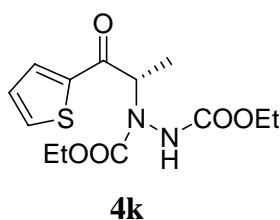

$R_f = 0.1$  (petroleum ether/EtOAc = 10:1); 63% yield; colorless oil;  $[\alpha]_D^{20} = 3.1$  ( $c = 0.23$  in EtOH); 96% ee, determined by HPLC analysis [Daicel chiralcel AS, *n*-hexane/*i*-PrOH = 70/30, 1.0 mL/min,  $\lambda = 254$  nm,  $t$  (major) = 8.24 min,  $t$  (minor) = 12.58 min];  $^1\text{H}$  NMR (300 MHz, CDCl<sub>3</sub>):  $\delta = 7.82$  (br.s, 1H), 7.70 (d,  $J = 4.9$  Hz, 1H), 7.17 (t,  $J = 4.3$  Hz, 1H), 6.85 (s, 1H), 5.68-5.66 (m, 1H), 4.24-4.10 (m, 4H), 1.55 (d,  $J = 7.0$  Hz, 3H), 1.36-1.18 (m, 6H) ppm;  $^{13}\text{C}$  NMR (75 MHz, CDCl<sub>3</sub>):  $\delta = 192.9, 156.3, 134.6, 133.3, 133.0, 132.6, 128.7, 128.4, 77.2, 64.1, 62.9, 62.5, 62.3, 62.0, 59.9, 58.6, 31.6, 29.7, 25.2, 22.6, 15.1, 14.4, 14.3, 14.2, 14.1$  ppm; ESI-HRMS: calcd. for C<sub>13</sub>H<sub>18</sub>N<sub>2</sub>O<sub>5</sub>S+H 315.1009, found 315.1012.

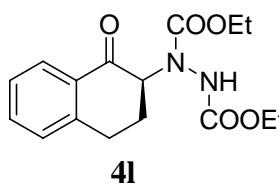

$R_f = 0.1$  (petroleum ether/EtOAc = 9:1); 74% yield; colorless oil;  $[\alpha]_D^{20} = 4.1$  ( $c = 0.25$  in EtOH); 90% ee, determined by HPLC analysis [Daicel chiralcel OD, *n*-hexane/*i*-PrOH = 90/10, 1.0 mL/min,  $\lambda = 254$  nm,  $t$  (minor) = 14.82 min,  $t$  (major) = 15.66 min];  $^1\text{H}$  NMR (300 MHz, CDCl<sub>3</sub>):  $\delta = 8.01$  (d,  $J = 7.4$  Hz, 1H), 7.51 (t,  $J = 7.6$  Hz, 1H), 7.34 (d,  $J = 7.3$  Hz, 1H), 7.29 (d,  $J = 6.7$  Hz, 1H), 6.70 (s, 1H), 5.22-5.17 (m, 1H), 4.27-4.17 (m, 4H), 3.26-3.20 (m, 1H), 3.10-3.05 (m, 1H), 2.55-2.52 (m, 1H), 2.38-2.28 (m, 1H), 1.33-1.23 (m, 6H) ppm;  $^{13}\text{C}$  NMR (75 MHz, CDCl<sub>3</sub>):  $\delta = 194.9, 157.0, 156.6, 156.3, 143.8, 134.1, 131.9, 128.8, 127.7, 126.8, 65.4, 64.4, 63.0, 62.9, 62.0, 29.7, 28.8, 27.7, 27.6, 21.9, 14.4$  ppm; ESI-HRMS: calcd. for C<sub>16</sub>H<sub>20</sub>N<sub>2</sub>O<sub>5</sub>+H 321.1445, found 321.1439.

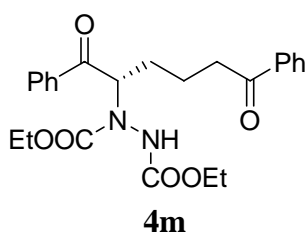

$R_f = 0.1$  (petroleum ether/EtOAc = 7:1); 51% yield; colorless oil;  $[\alpha]_D^{20} = -8.4$  ( $c = 0.36$  in EtOH); 88% ee, determined by HPLC analysis [Daicel chiralcel AS, *n*-hexane/*i*-PrOH = 70/30, 1.0 mL/min,  $\lambda = 254$  nm,  $t$  (major) = 10.54 min,  $t$  (minor) = 13.90 min];  $^1\text{H}$  NMR (300 MHz, CDCl<sub>3</sub>):  $\delta = 7.95$  (d,  $J = 7.4$  Hz, 4H), 7.61-7.53 (m, 2H), 7.47-7.43 (m, 4H), 6.98 (s, 1H), 5.79-5.76 (m, 1H), 4.21-4.09 (m, 4H), 3.12-3.04 (m, 2H), 2.17-1.82 (m, 4H), 1.28-1.25 (m, 6H) ppm;  $^{13}\text{C}$  NMR (75 MHz, CDCl<sub>3</sub>):  $\delta = 199.9, 156.6, 156.0, 136.8, 134.9, 133.7, 133.0, 129.3, 128.8, 128.6, 128.0, 77.2, 68.7, 63.4, 63.0, 61.9, 37.7, 31.9, 29.7, 29.3, 27.8, 22.7, 21.2, 14.4, 14.1$  ppm; ESI-HRMS: calcd. for C<sub>24</sub>H<sub>28</sub>N<sub>2</sub>O<sub>6</sub>+H 441.2020, found 441.2022.

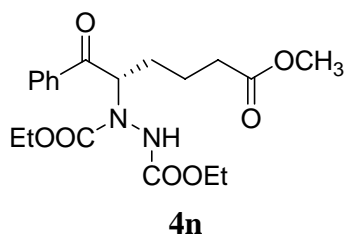

$R_f = 0.1$  (petroleum ether/EtOAc = 7:1); 39% yield; colorless oil;  $[\alpha]_D^{20} = -7.0$  ( $c = 0.24$  in EtOH); 96% ee, determined by HPLC analysis [Daicel chiralcel AS, *n*-hexane/*i*-PrOH = 70/30, 1.0 mL/min,  $\lambda = 254$  nm,  $t$  (major) = 8.70 min,  $t$  (minor) = 10.22 min];  $^1\text{H}$  NMR (300 MHz,  $\text{CDCl}_3$ ):  $\delta = 7.91$  (br.s, 2H), 7.59 (t,  $J = 7.1$  Hz, 1H), 7.48 (t,  $J = 7.4$  Hz, 2H), 6.90 (br.s, 1H), 5.71 (br.s, 1H), 4.35-4.16 (m, 4H), 3.64 (s, 3H), 2.38-2.36 (m, 2H), 2.02 (br.s, 1H), 1.86 (br.s, 3H), 1.35-1.25 (m, 6H) ppm;  $^{13}\text{C}$  NMR (75 MHz,  $\text{CDCl}_3$ ):  $\delta = 199.7, 173.6, 156.9, 156.0, 135.0, 133.7, 128.8, 128.5, 77.2, 64.1, 63.0, 62.5, 61.9, 51.5, 33.4, 32.7, 31.9, 30.0, 29.7, 29.3, 27.7, 27.1, 22.7, 21.8, 14.4, 14.1$  ppm; ESI-HRMS: calcd. for  $\text{C}_{19}\text{H}_{26}\text{N}_2\text{O}_7 + \text{H}$  395.1813, found 395.1818.

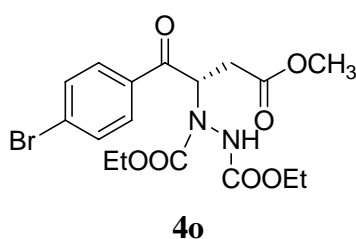

$R_f = 0.1$  (petroleum ether/EtOAc = 7:1); 65% yield; colorless oil;  $[\alpha]_D^{20} = -5.8$  ( $c = 0.36$  in EtOH); 91% ee, determined by HPLC analysis [Daicel chiralcel AS, *n*-hexane/*i*-PrOH = 70/30, 1.0 mL/min,  $\lambda = 254$  nm,  $t$  (major) = 7.47 min,  $t$  (minor) = 11.84 min];  $^1\text{H}$  NMR (300 MHz,  $\text{CDCl}_3$ ):  $\delta = 7.89$ -7.80 (m, 2H), 7.62 (d,  $J = 8.5$  Hz, 2H), 6.48 (s, 1H), 6.10 (br.s, 1H), 4.29-4.10 (m, 4H), 3.67 (s, 3H), 2.96-2.92 (m, 2H), 1.33-1.16 (m, 6H) ppm;  $^{13}\text{C}$  NMR (75 MHz,  $\text{CDCl}_3$ ):  $\delta = 195.0, 171.1, 156.0, 155.4, 133.6, 132.1, 130.2, 130.0, 128.9, 77.2, 63.3, 62.3, 59.7, 57.8, 52.1, 33.3, 32.7, 31.9, 29.7, 29.5, 29.3, 14.3, 14.1$  ppm; ESI-HRMS: calcd. for  $\text{C}_{17}\text{H}_{21}\text{BrN}_2\text{O}_7 + \text{H}$  445.0610, found 445.0613.

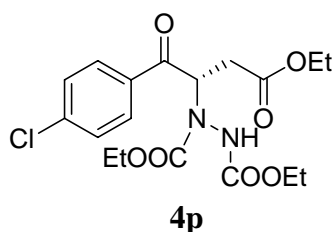

$R_f = 0.1$  (petroleum ether/EtOAc = 9:1); 63% yield; colorless oil;  $[\alpha]_D^{20} = -20.0$  ( $c = 0.31$  in EtOH); 91% ee, determined by HPLC analysis [Daicel chiralcel AS, *n*-hexane/*i*-PrOH = 70/30, 1.0 mL/min,  $\lambda = 254$  nm,  $t$  (major) = 7.30 min,  $t$  (minor) = 10.93 min];  $^1\text{H}$  NMR (300 MHz,  $\text{CDCl}_3$ ):  $\delta = 7.98$ -7.91 (m, 2H), 7.45 (d,  $J = 8.4$  Hz, 2H), 6.49 (s, 1H), 6.11 (br.s, 1H), 4.15-4.09 (m, 6H), 2.95-2.93 (m, 2H), 1.22 (t,  $J = 6.9$  Hz, 9H) ppm;  $^{13}\text{C}$  NMR (75 MHz,  $\text{CDCl}_3$ ):  $\delta = 194.8, 170.6, 156.0, 155.5, 140.1, 133.3, 130.1, 129.9, 129.1, 77.2, 63.5, 63.3, 62.2, 61.0, 59.6, 57.6, 33.6, 33.0, 29.7, 22.6, 14.3, 14.0$  ppm; ESI-HRMS: calcd. for  $\text{C}_{18}\text{H}_{23}\text{ClN}_2\text{O}_7 + \text{H}$  415.1267, found 415.1271.

## References

- (1) Brunner, H.; Bügler, J.; Nuber, B. *Tetrahedron: Asymmetry* **1995**, 6, 1699.
- (2) Matsubara, R.; Kobayashi, S. *Angew. Chem., Int. Ed.* **2006**, 45, 7993.

## NMR and HPLC spectra

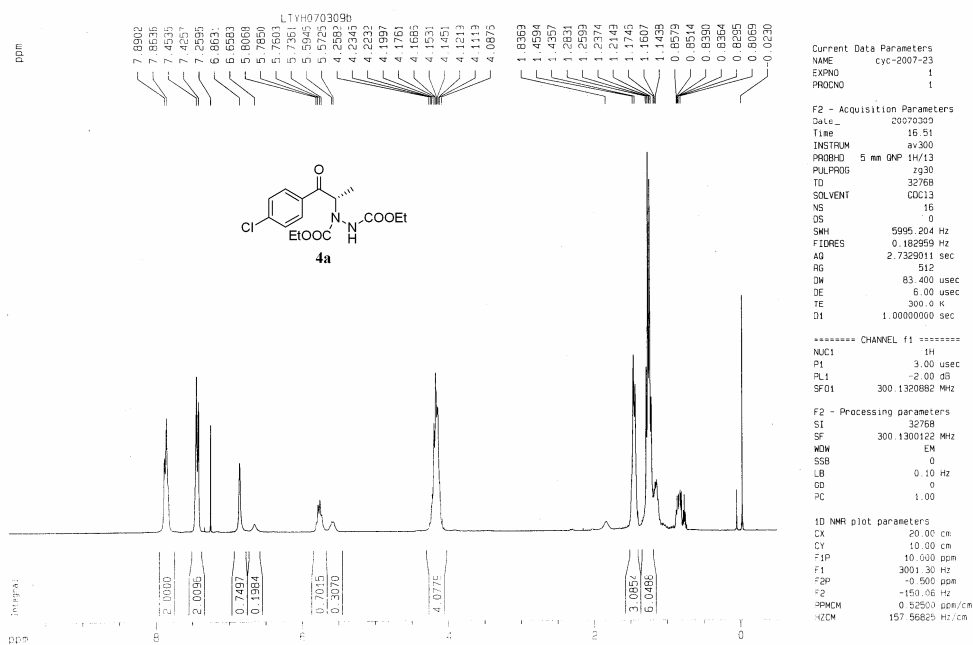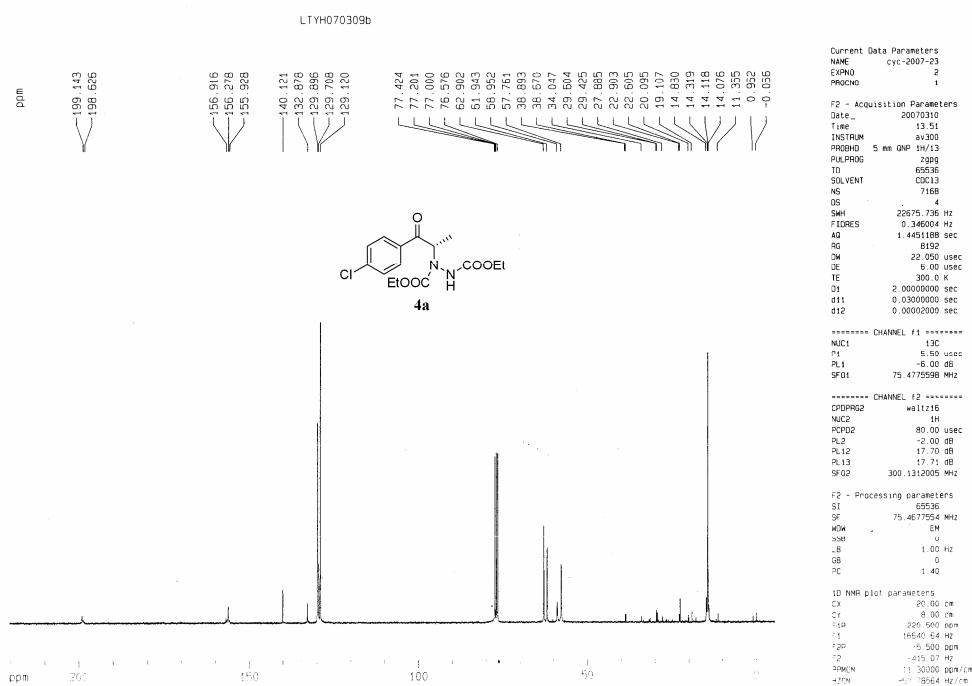



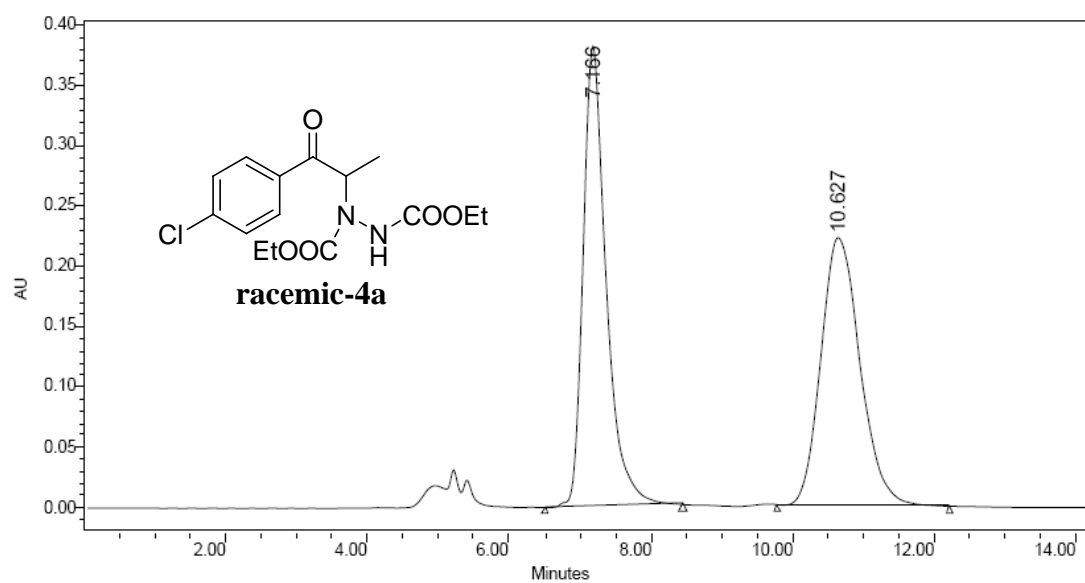

|   | RT<br>(min) | Area<br>( V *sec) | % Area | Height<br>( V ) | %<br>Height |
|---|-------------|-------------------|--------|-----------------|-------------|
| 1 | 7.166       | 8654159           | 50.36  | 382131          | 63.22       |
| 2 | 10.627      | 8531213           | 49.64  | 222326          | 36.78       |

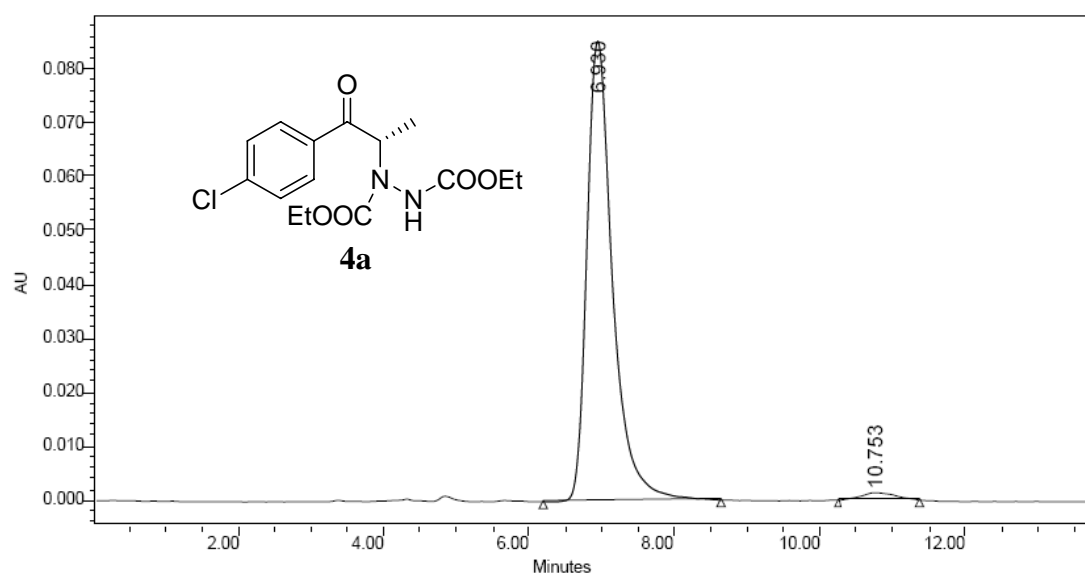

|   | RT<br>(min) | Area<br>( V *sec) | % Area | Height<br>( V ) | %<br>Height |
|---|-------------|-------------------|--------|-----------------|-------------|
| 1 | 6.930       | 2111884           | 98.83  | 85372           | 98.85       |
| 2 | 10.753      | 25093             | 1.17   | 992             | 1.15        |

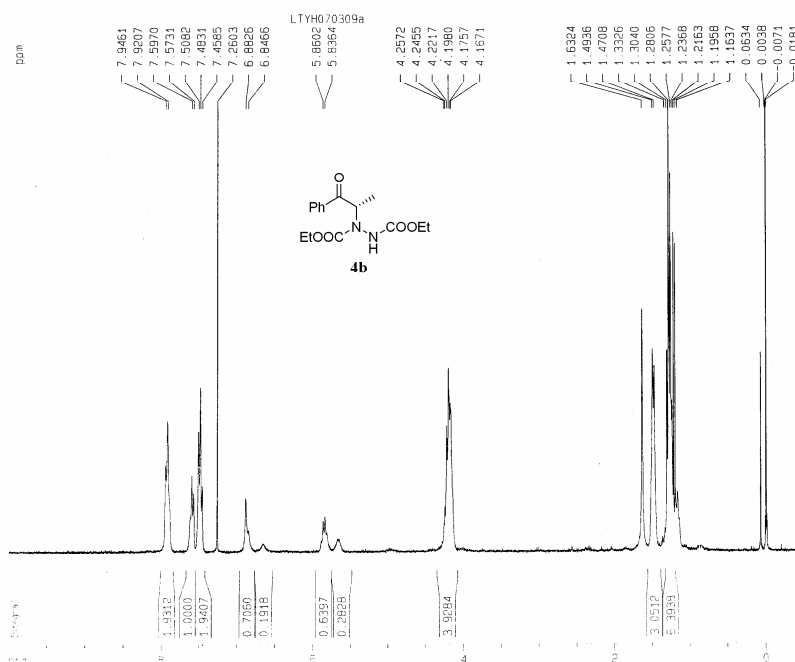

Current Data Parameters  
NAME: cyc-2007-22  
EXPNO: 1  
PROCNO: 1

F2 - Acquisition Parameters  
Date\_: 20070309  
Time: 16.43  
INSTRUM: av300  
PROBHD: 5 mm QNP 1H/13  
PULPROG: zg30  
TD: 32768  
SOLVENT: CDCl3  
NS: 32  
DS: 0  
SWH: 5995.204 Hz  
FIDRES: 0.182959 Hz  
AQ: 2.7329611 sec  
RG: 612  
DW: 83.400 usec  
DE: 6.00 usec  
TE: 300.0 K  
D1: 1.00000000 sec

\*\*\*\*\* CHANNEL f1 \*\*\*\*\*  
NUC1: 1H  
P1: 3.00 usec  
PL1: -2.00 dB  
SF01: 300.1320882 MHz

F2 - Processing parameters  
SI: 32768  
SF: 300.1300122 MHz  
WDW: EM  
SSB: 0  
LB: 0.10 Hz  
GB: 0  
PC: 1.00

1D NMR plot parameters  
CX: 20.00 cm  
CY: 30.00 cm  
F1P: 10.000 ppm  
F1: 3001.30 Hz  
F2P: -5.500 ppm  
F2: 140.06 Hz  
PPMCM: 0.52500 ppm/cm  
G2CM: 157.56825 Hz/cm

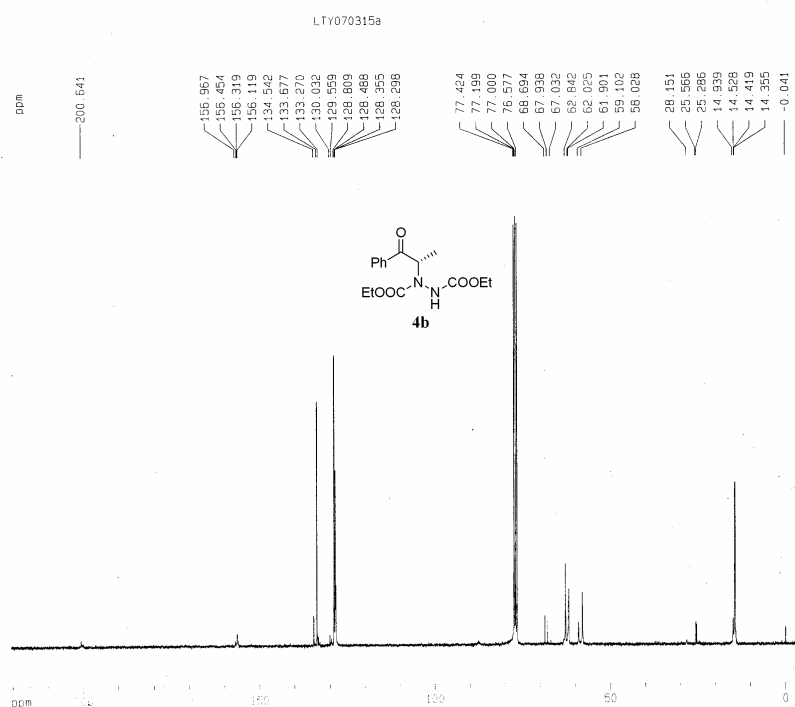

Current Data Parameters  
NAME: cyc-2007-33  
EXPNO: 2  
PROCNO: 1

F2 - Acquisition Parameters  
Date\_: 20070319  
Time: 16.55  
INSTRUM: av300  
PROBHD: 5 mm QNP 1H/13  
PULPROG: zgpg30  
TD: 65536  
SOLVENT: CDCl3  
NS: 15150  
DS: 4  
SWH: 22675.736 Hz  
FIDRES: 0.346004 Hz  
AQ: 1.4491188 sec  
RG: 8192  
DW: 22.050 usec  
DE: 6.00 usec  
TE: 300.0 K  
D1: 2.00000000 sec  
d11: 0.00000000 sec  
d12: 0.00002000 sec

\*\*\*\*\* CHANNEL f1 \*\*\*\*\*  
NUC1: 13C  
P1: 5.50 usec  
PL1: -6.00 dB  
SF01: 75.4775598 MHz

\*\*\*\*\* CHANNEL f2 \*\*\*\*\*  
PULPROG2: waltz16  
NUC2: 1H  
P2P2: 80.00 usec  
PL2: -2.00 dB  
PL12: 17.70 dB  
PL13: 17.71 dB  
SF02: 300.1312005 MHz

F2 - Processing parameters  
SI: 65536  
SF: 75.4677544 MHz  
WDW: EM  
SSB: 0  
LB: 1.00 Hz  
GB: 0  
PC: 1.40

1D NMR plot parameters  
CX: 20.00 cm  
CY: 11.00 cm  
F1P: 220.500 ppm  
F1: 18840.64 Hz  
F2P: -5.500 ppm  
F2: -415.07 Hz  
PPMCM: 11.50000 ppm/cm  
G2CM: 802.76661 Hz/cm

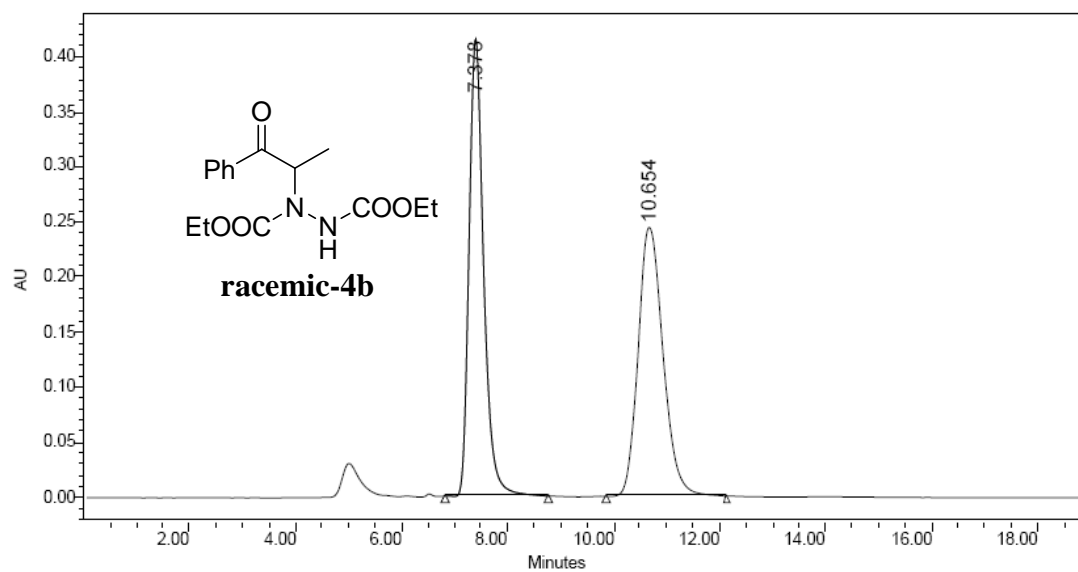

|   | RT<br>(min) | Area<br>( V *sec) | % Area | Height<br>( V ) | %<br>Height |
|---|-------------|-------------------|--------|-----------------|-------------|
| 1 | 7.378       | 7940211           | 49.81  | 415922          | 62.98       |
| 2 | 10.654      | 7999902           | 50.19  | 244515          | 37.02       |

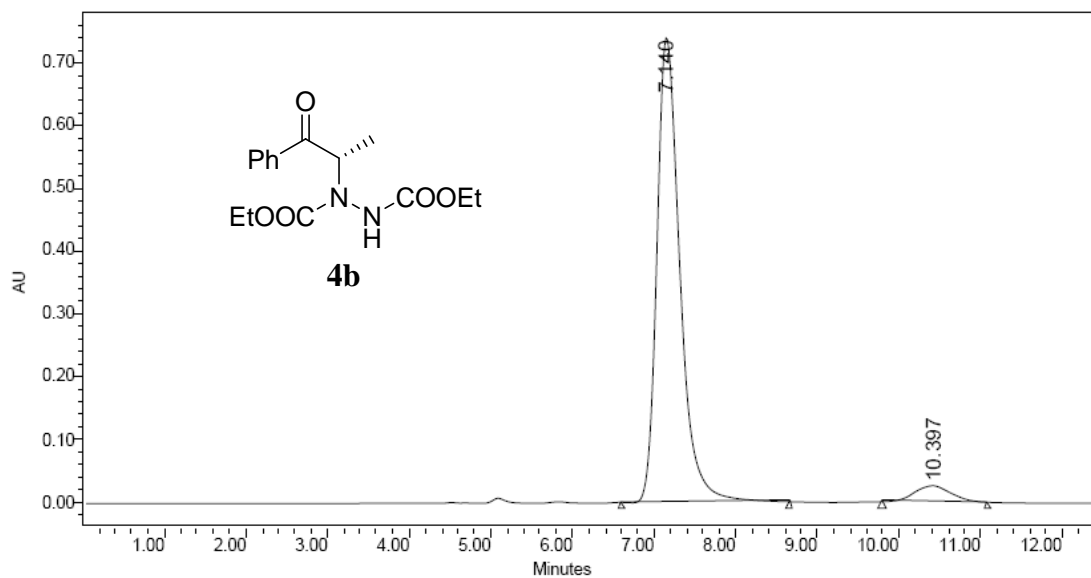

|   | RT<br>(min) | Area<br>( V *sec) | % Area | Height<br>( V ) | %<br>Height |
|---|-------------|-------------------|--------|-----------------|-------------|
| 1 | 7.140       | 14464017          | 96.79  | 739069          | 97.39       |
| 2 | 10.397      | 480203            | 3.21   | 19783           | 2.61        |

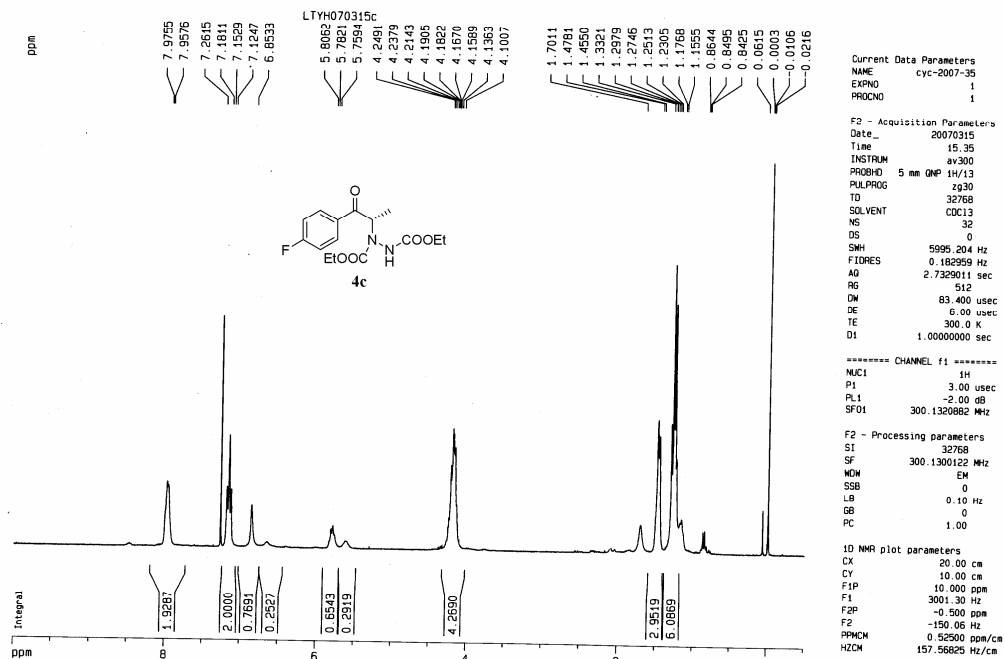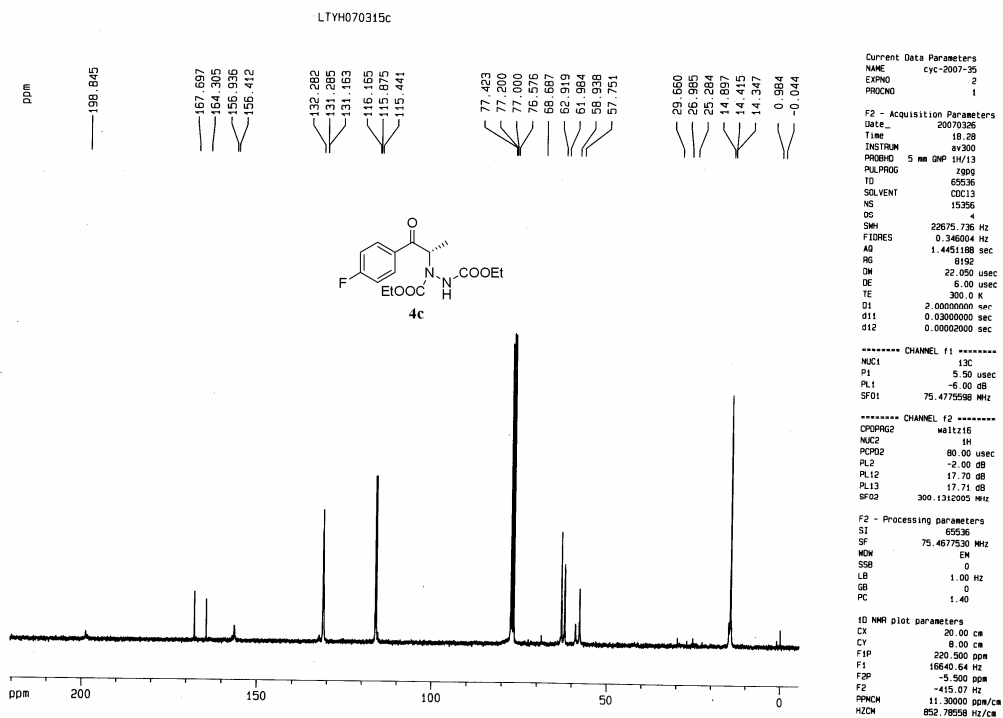

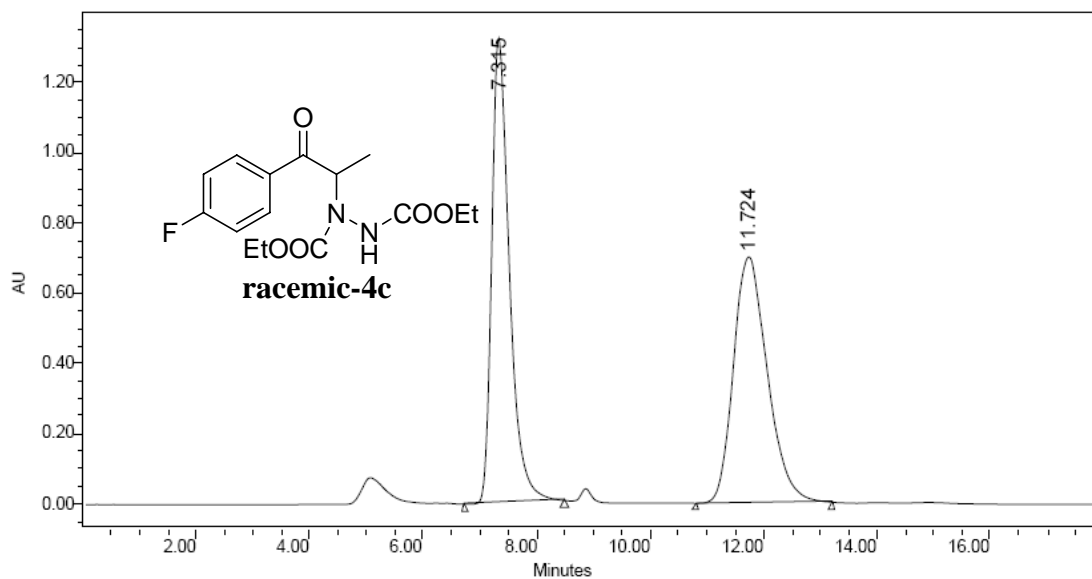

|   | RT<br>(min) | Area<br>( V *sec) | % Area | Height<br>( V ) | %<br>Height |
|---|-------------|-------------------|--------|-----------------|-------------|
| 1 | 7.315       | 28654220          | 49.55  | 1324830         | 65.39       |
| 2 | 11.724      | 29175232          | 50.45  | 701252          | 34.61       |

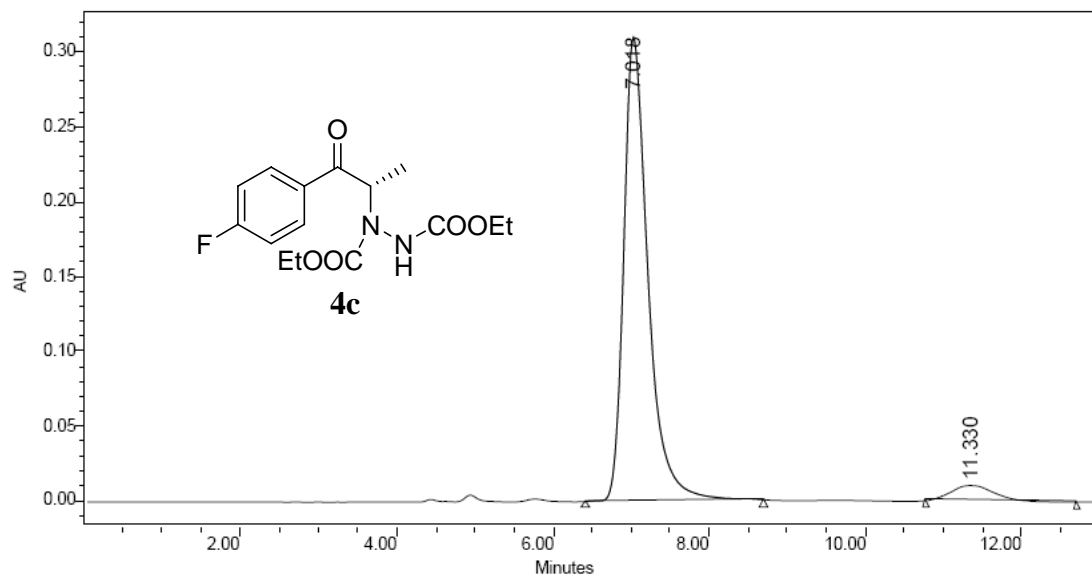

|   | RT<br>(min) | Area<br>( V *sec) | % Area | Height<br>( V ) | %<br>Height |
|---|-------------|-------------------|--------|-----------------|-------------|
| 1 | 7.018       | 6713016           | 96.69  | 309568          | 97.56       |
| 2 | 11.330      | 229753            | 3.31   | 7746            | 2.44        |

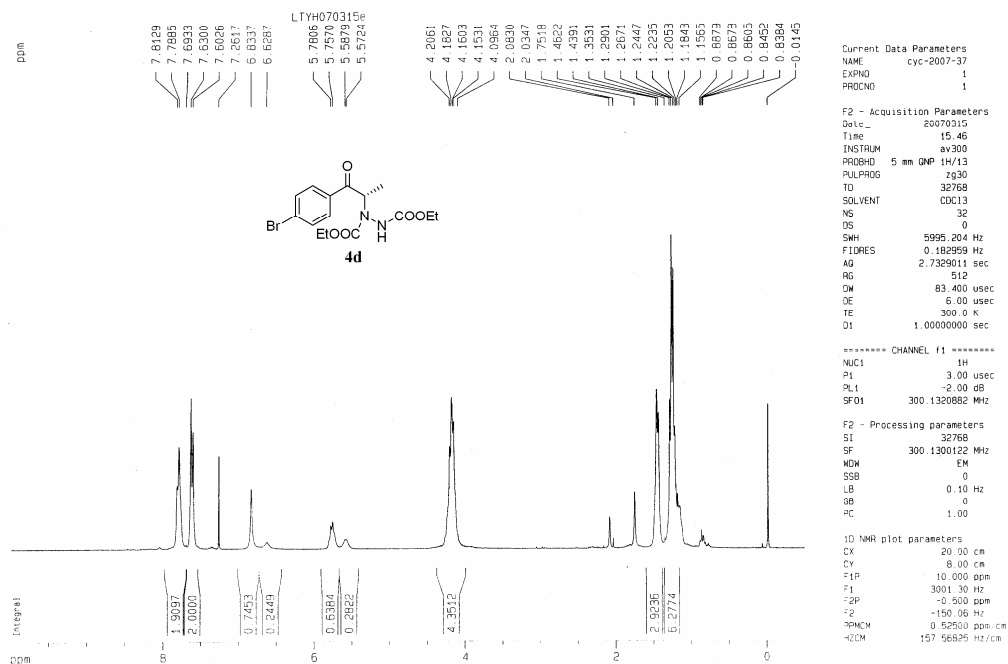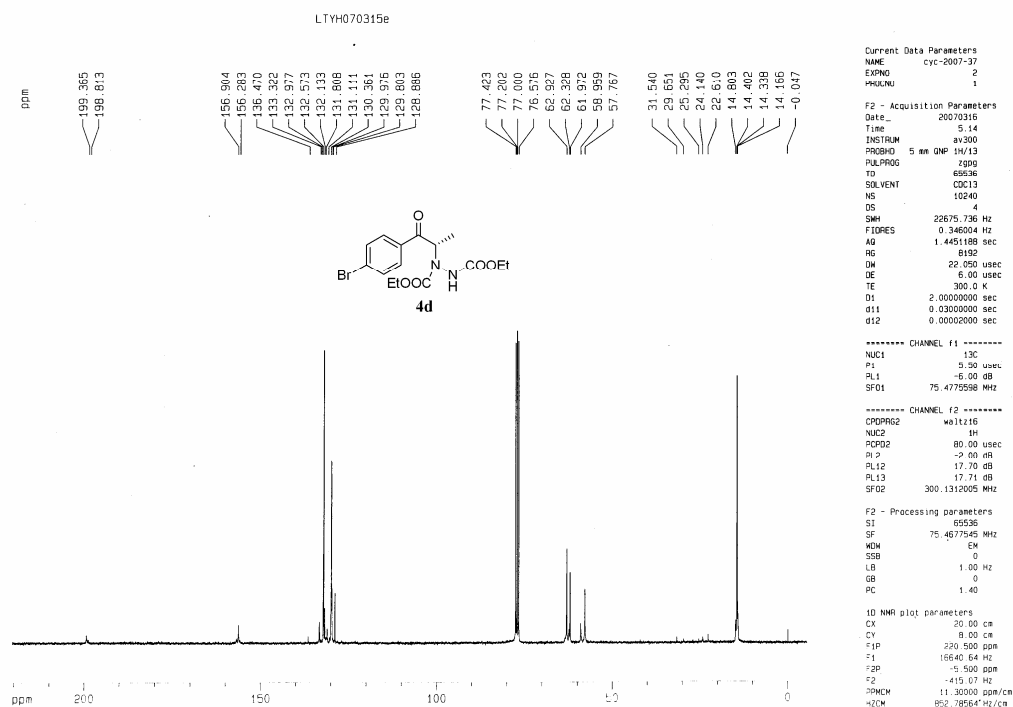

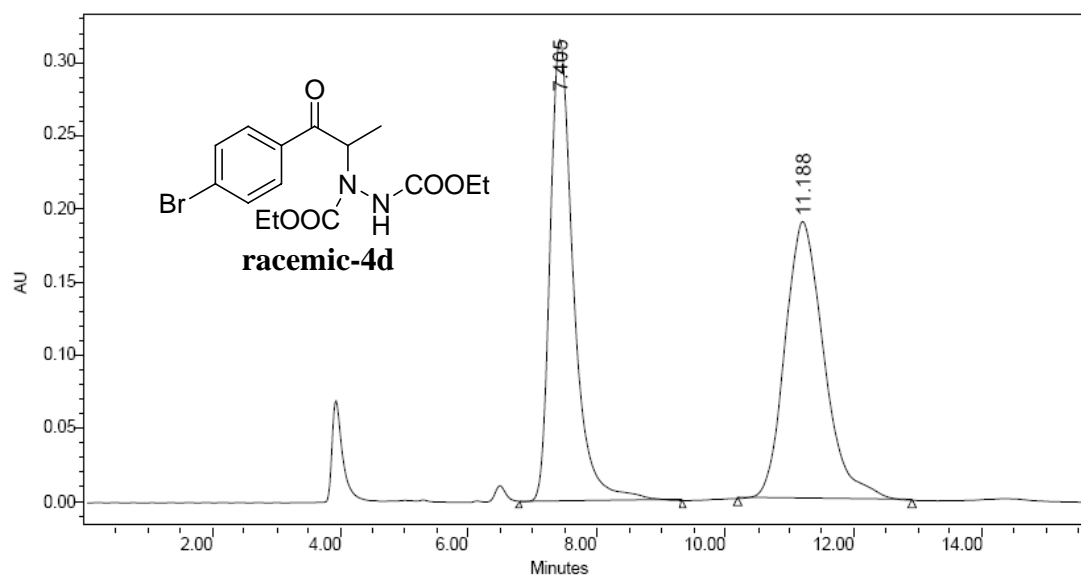

|   | RT<br>(min) | Area<br>( V *sec) | % Area | Height<br>( V ) | %<br>Height |
|---|-------------|-------------------|--------|-----------------|-------------|
| 1 | 7.405       | 7982213           | 49.81  | 314917          | 62.44       |
| 2 | 11.188      | 8041975           | 50.19  | 189435          | 37.56       |

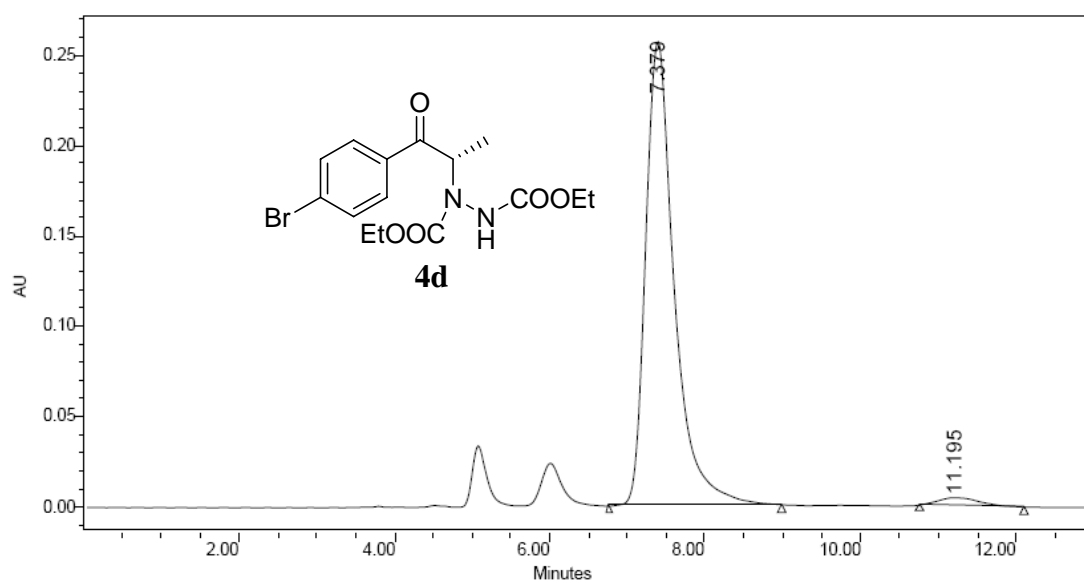

|   | RT<br>(min) | Area<br>( V *sec) | % Area | Height<br>( V ) | %<br>Height |
|---|-------------|-------------------|--------|-----------------|-------------|
| 1 | 7.379       | 6552626           | 98.45  | 256851          | 98.71       |
| 2 | 11.195      | 103077            | 1.55   | 3344            | 1.29        |

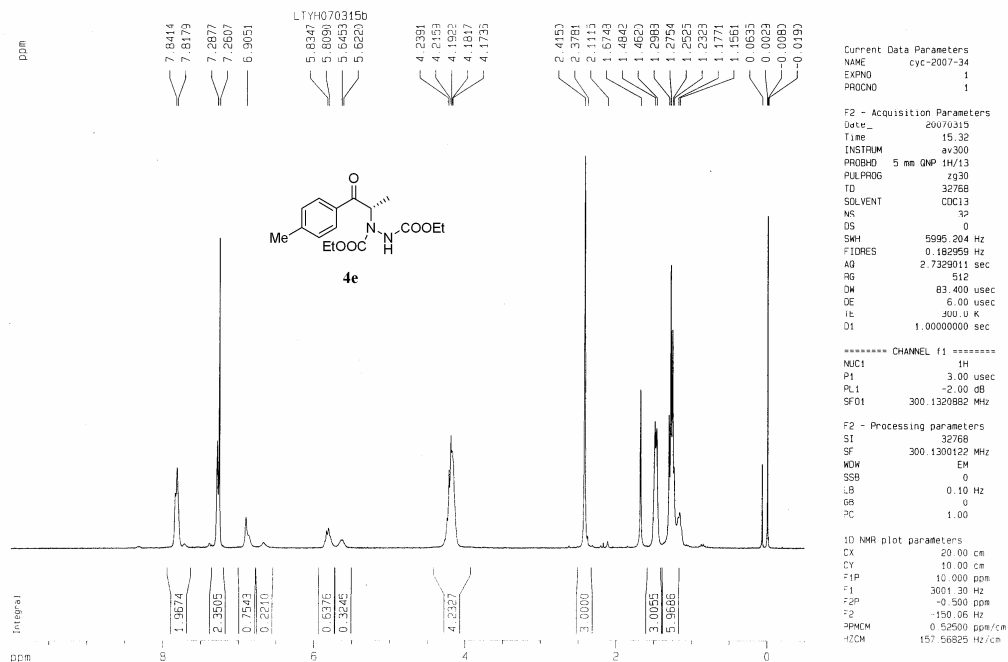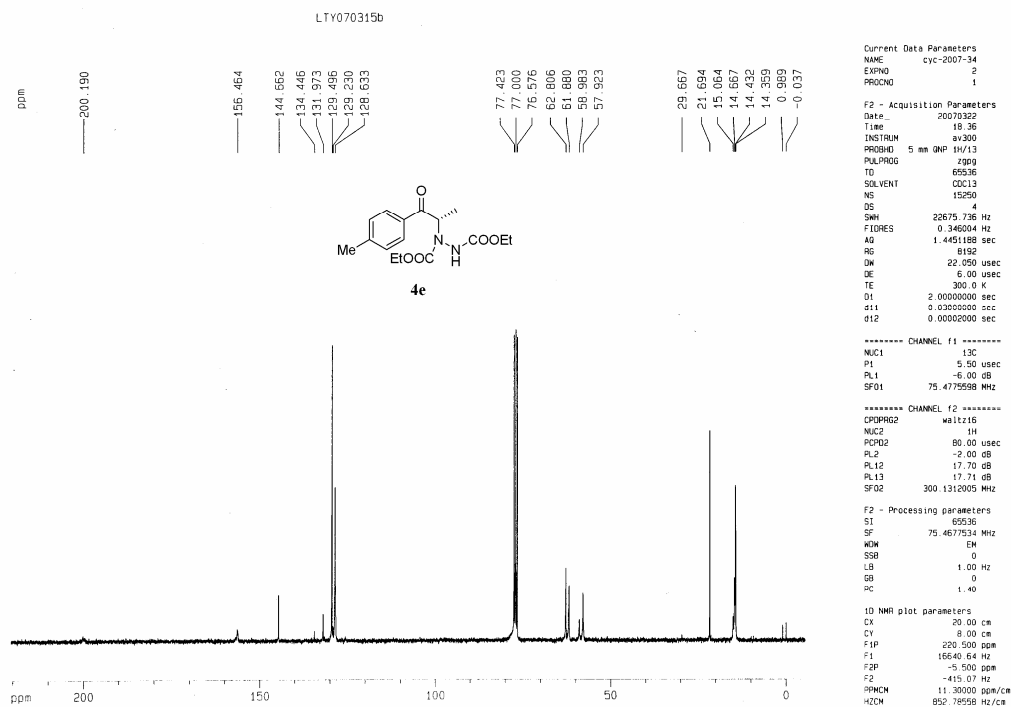



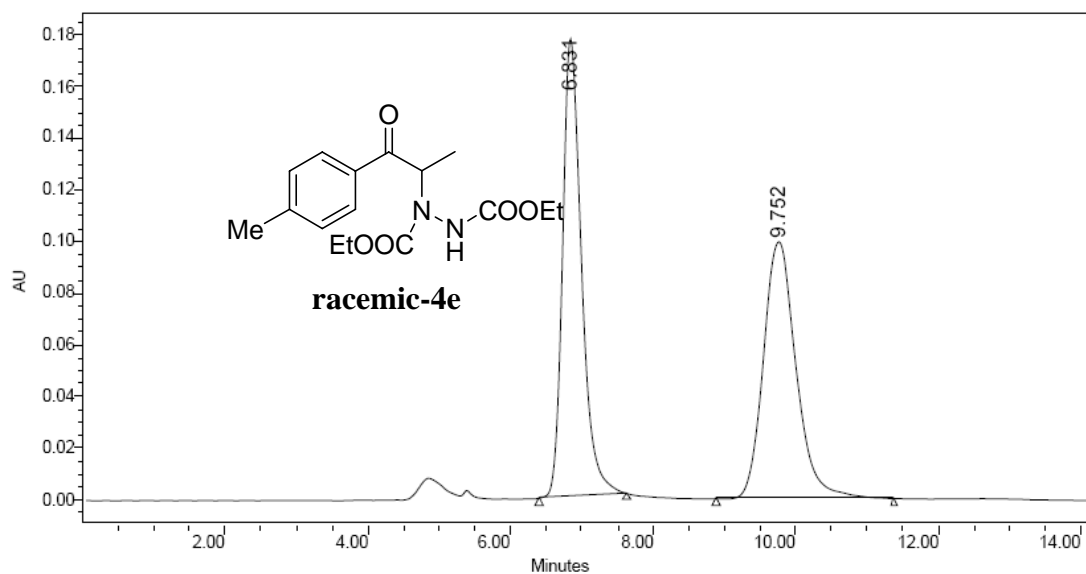

|   | RT<br>(min) | Area<br>( V *sec) | % Area | Height<br>( V ) | %<br>Height |
|---|-------------|-------------------|--------|-----------------|-------------|
| 1 | 6.831       | 3279332           | 50.73  | 177451          | 64.05       |
| 2 | 9.752       | 3184408           | 49.27  | 99606           | 35.95       |

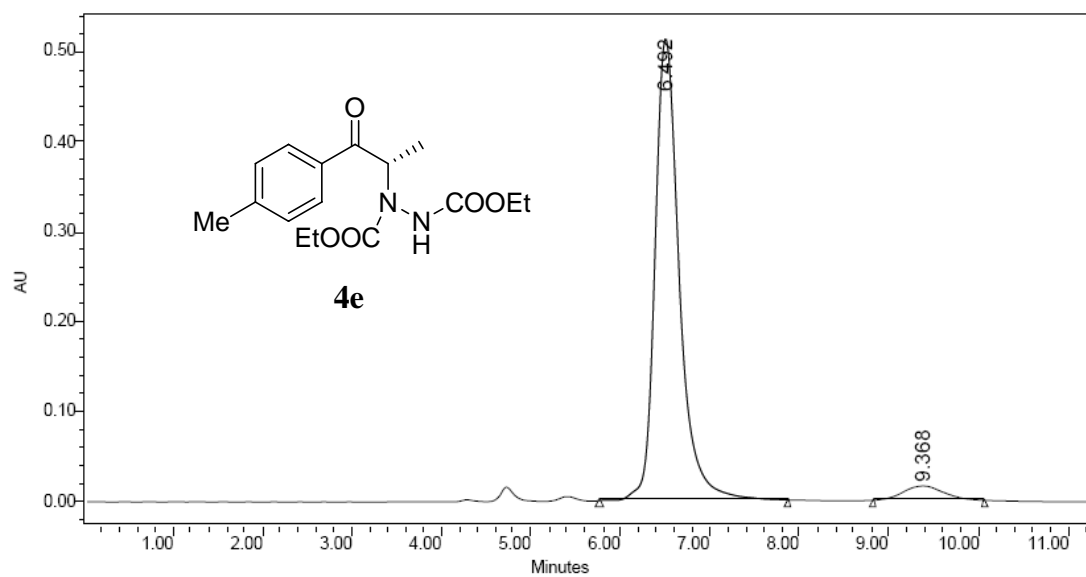

|   | RT<br>(min) | Area<br>( V *sec) | % Area | Height<br>( V ) | %<br>Height |
|---|-------------|-------------------|--------|-----------------|-------------|
| 1 | 6.492       | 9758208           | 96.88  | 514515          | 97.64       |
| 2 | 9.368       | 314368            | 3.12   | 12454           | 2.36        |

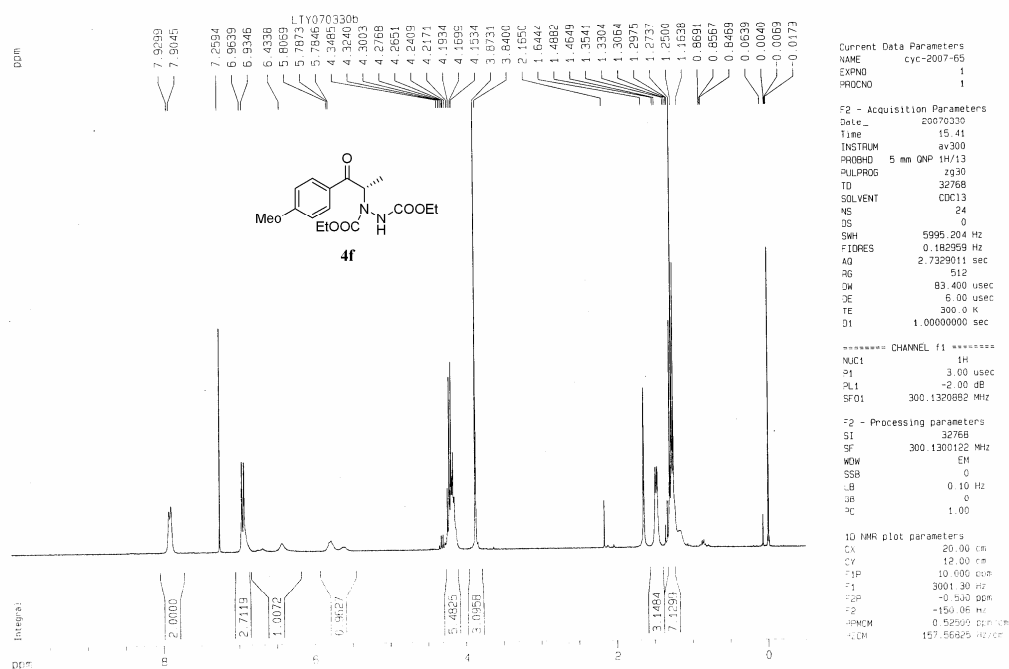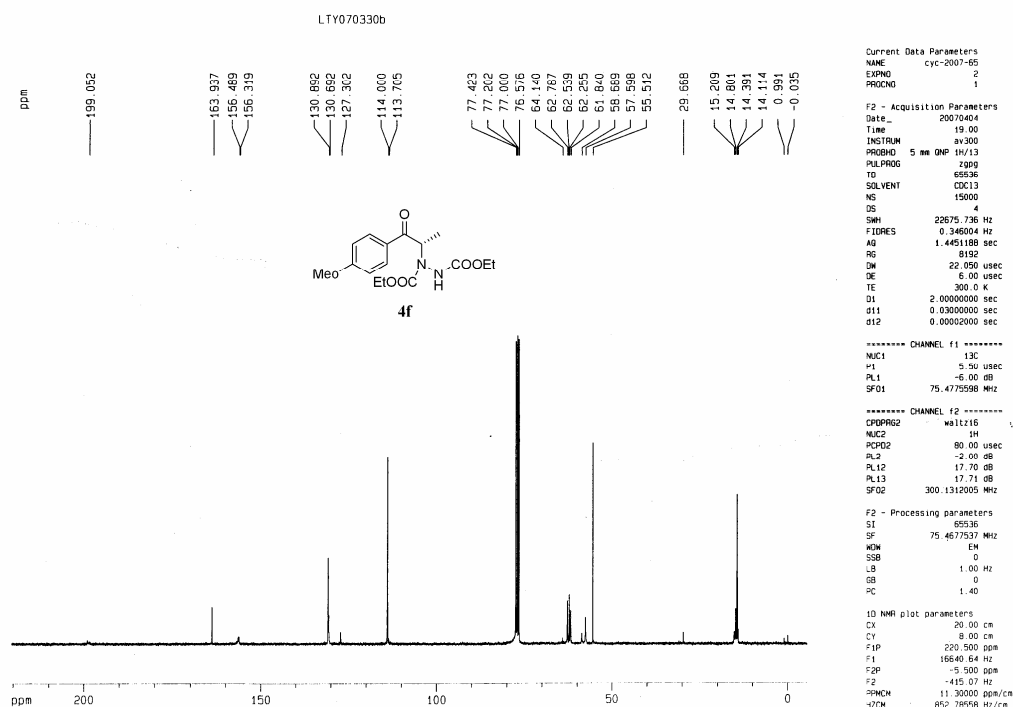

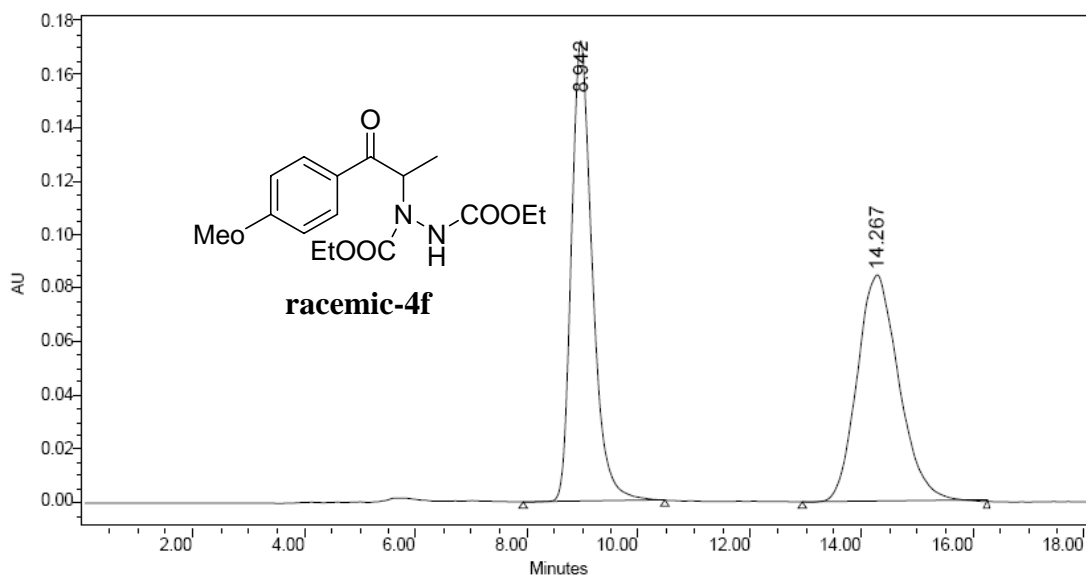

|   | RT<br>(min) | Area<br>( V *sec) | % Area | Height<br>( V ) | %<br>Height |
|---|-------------|-------------------|--------|-----------------|-------------|
| 1 | 8.942       | 4495742           | 50.31  | 172420          | 67.01       |
| 2 | 14.267      | 4440619           | 49.69  | 84880           | 32.99       |

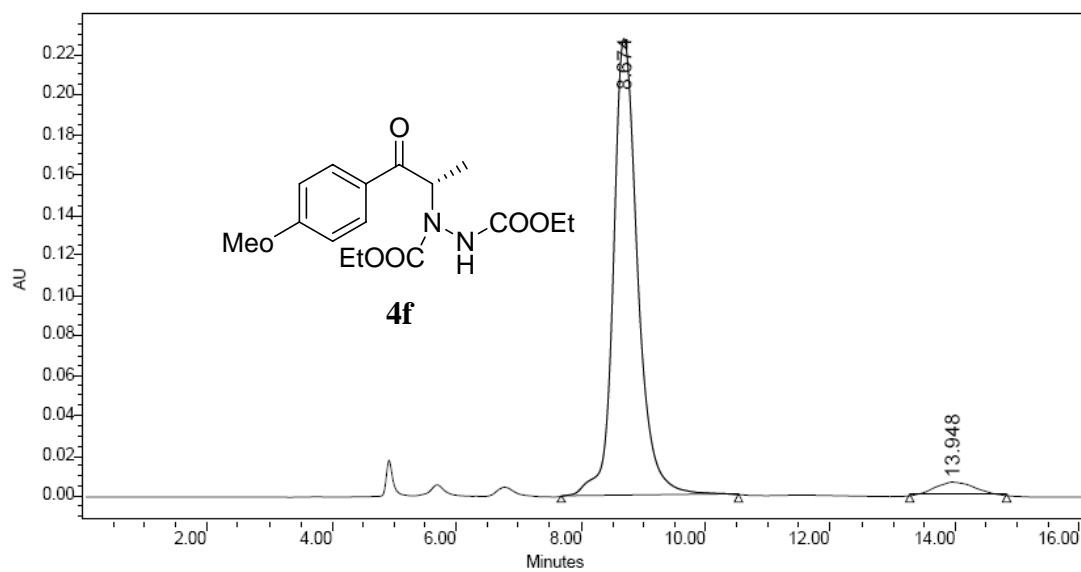

|   | RT<br>(min) | Area<br>( V *sec) | % Area | Height<br>( V ) | %<br>Height |
|---|-------------|-------------------|--------|-----------------|-------------|
| 1 | 8.674       | 6281791           | 96.88  | 228123          | 97.69       |
| 2 | 13.948      | 202047            | 3.12   | 5398            | 2.31        |

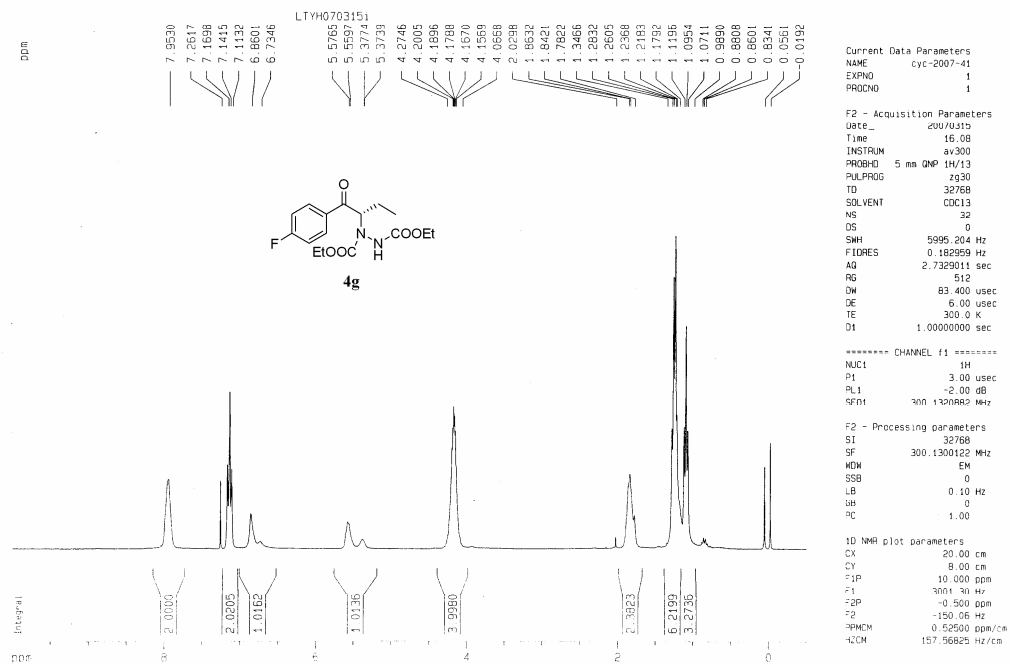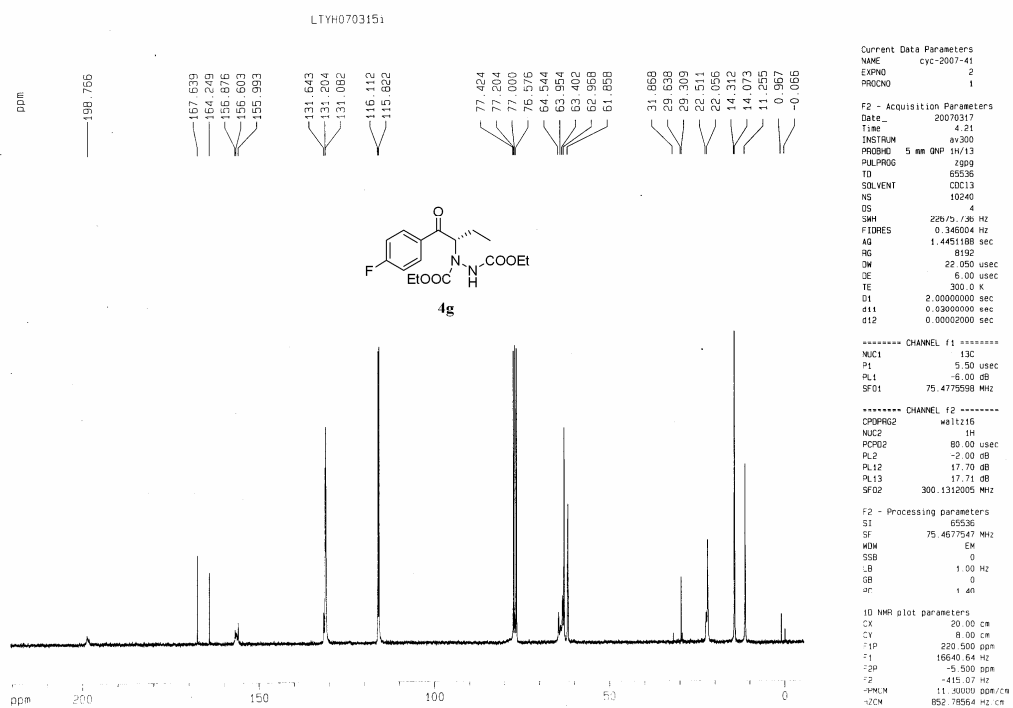

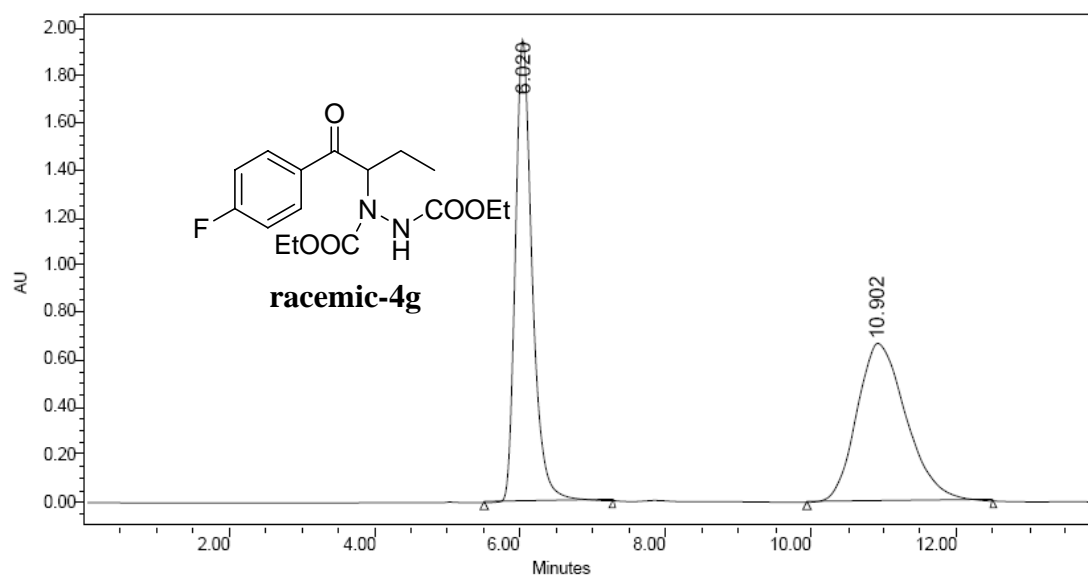

|   | RT<br>(min) | Area<br>( V *sec) | % Area | Height<br>( V ) | %<br>Height |
|---|-------------|-------------------|--------|-----------------|-------------|
| 1 | 6.020       | 31467918          | 49.72  | 1953225         | 74.47       |
| 2 | 10.902      | 31826290          | 50.28  | 669546          | 25.53       |

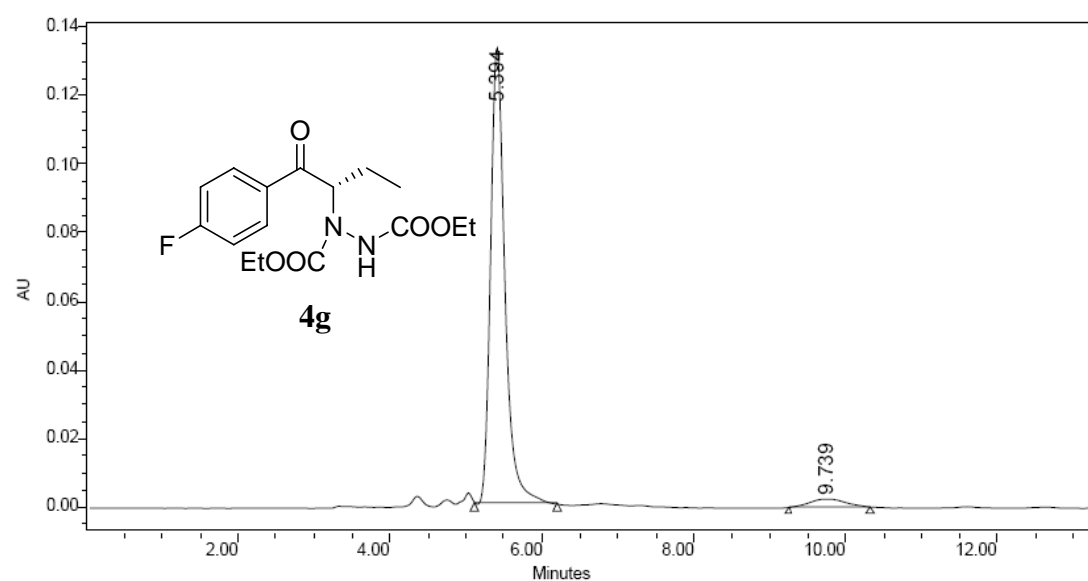

|   | RT<br>(min) | Area<br>( V *sec) | % Area | Height<br>( V ) | %<br>Height |
|---|-------------|-------------------|--------|-----------------|-------------|
| 1 | 5.394       | 1757264           | 98.05  | 133179          | 98.91       |
| 2 | 9.739       | 34960             | 1.95   | 1465            | 1.09        |

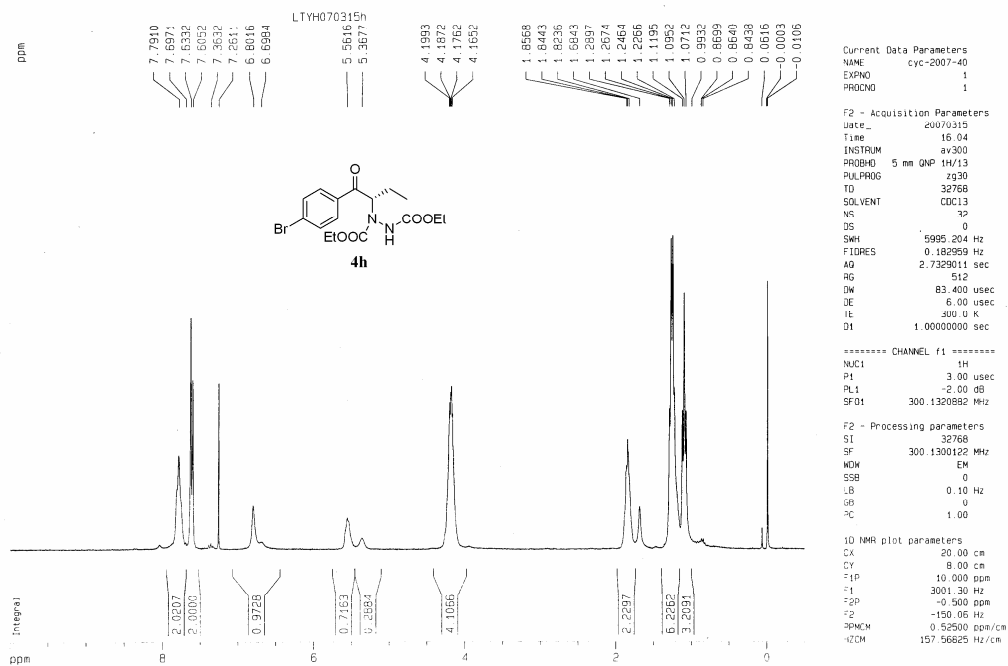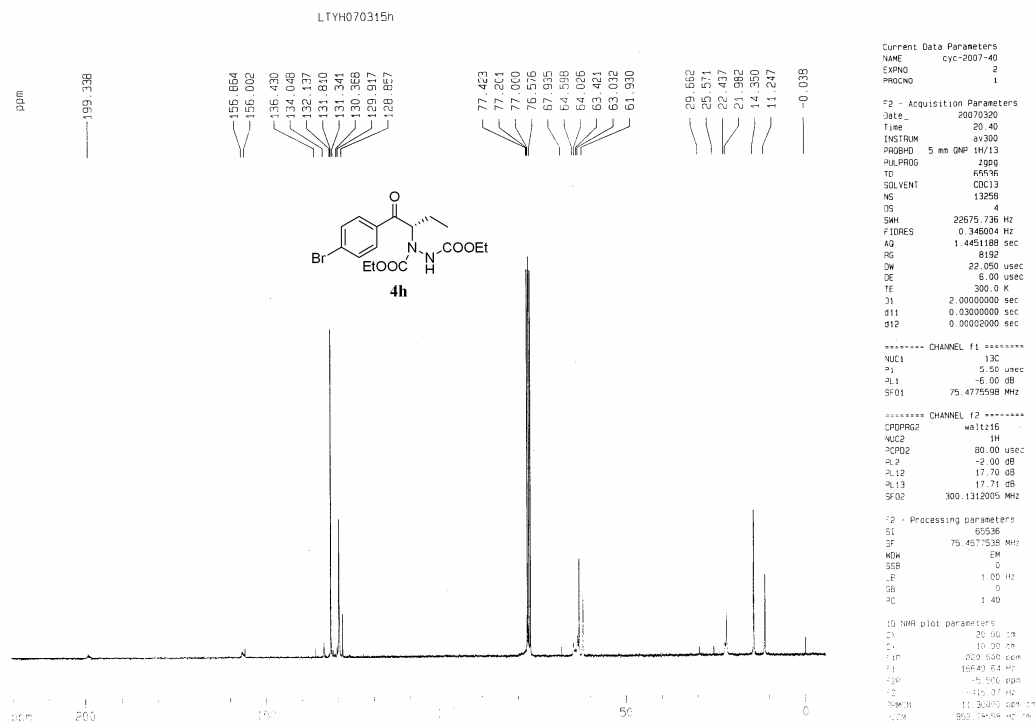

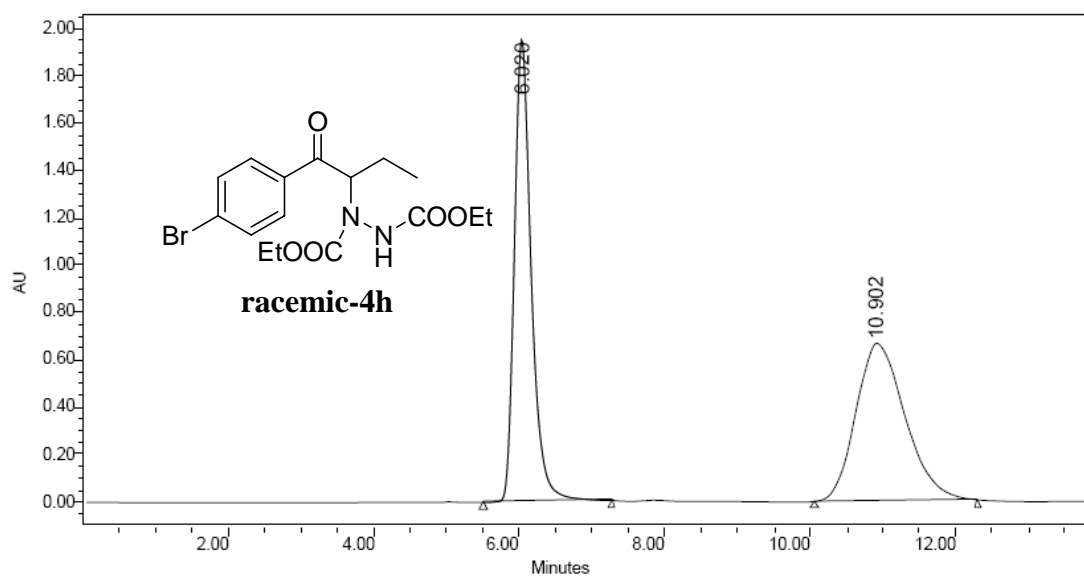

|   | RT<br>(min) | Area<br>( V *sec) | % Area | Height<br>( V ) | % Height |
|---|-------------|-------------------|--------|-----------------|----------|
| 1 | 6.020       | 31467918          | 50.07  | 1953225         | 74.55    |
| 2 | 10.902      | 31373957          | 49.93  | 666670          | 25.45    |

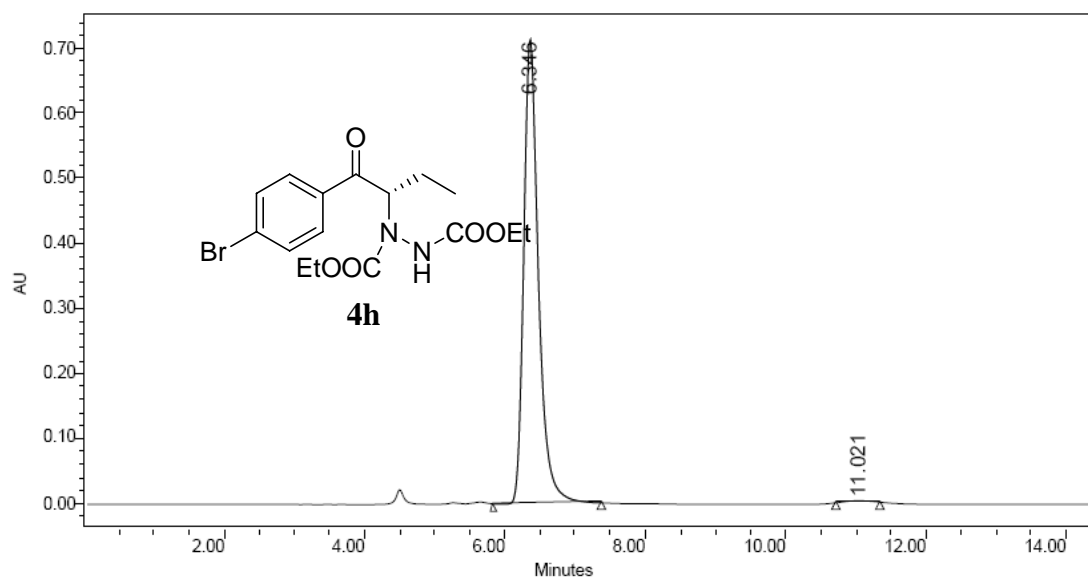

|   | RT<br>(min) | Area<br>( V *sec) | % Area | Height<br>( V ) | % Height |
|---|-------------|-------------------|--------|-----------------|----------|
| 1 | 6.346       | 10408808          | 99.39  | 714110          | 99.62    |
| 2 | 11.021      | 63632             | 0.61   | 2742            | 0.38     |

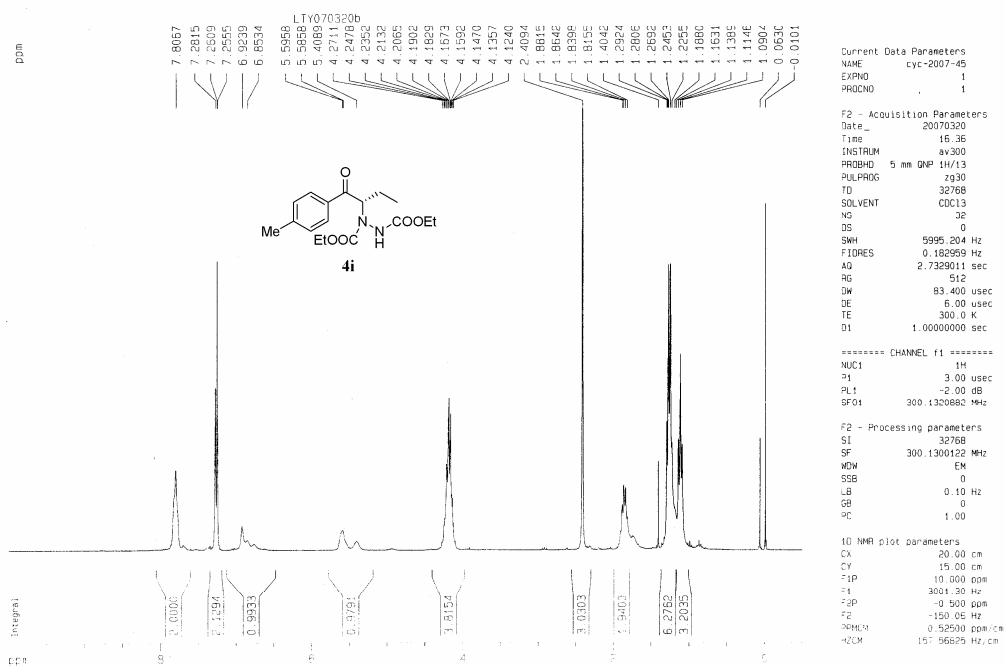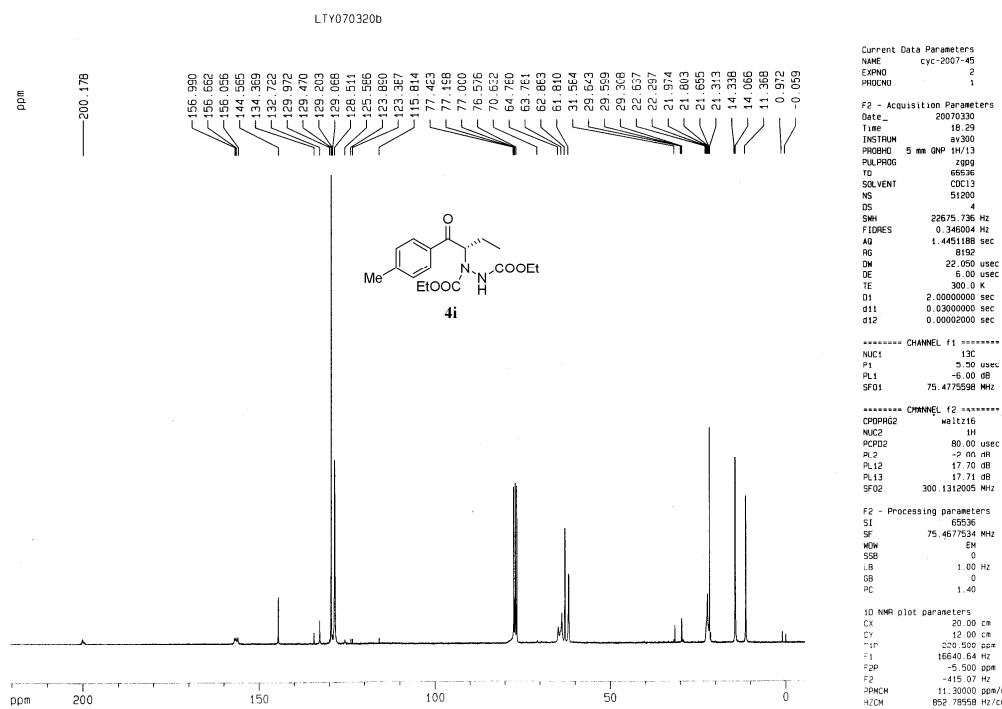



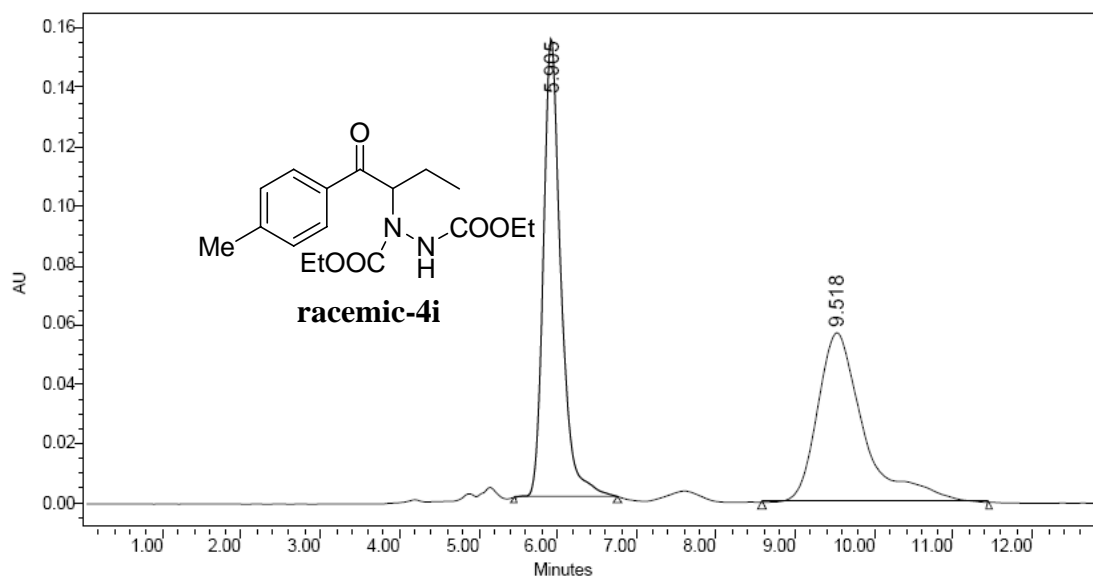

|   | RT<br>(min) | Area<br>(V*sec) | % Area | Height<br>(V) | % Height |
|---|-------------|-----------------|--------|---------------|----------|
| 1 | 5.905       | 2385442         | 50.44  | 154666        | 73.01    |
| 2 | 9.518       | 2343500         | 49.56  | 57184         | 26.99    |

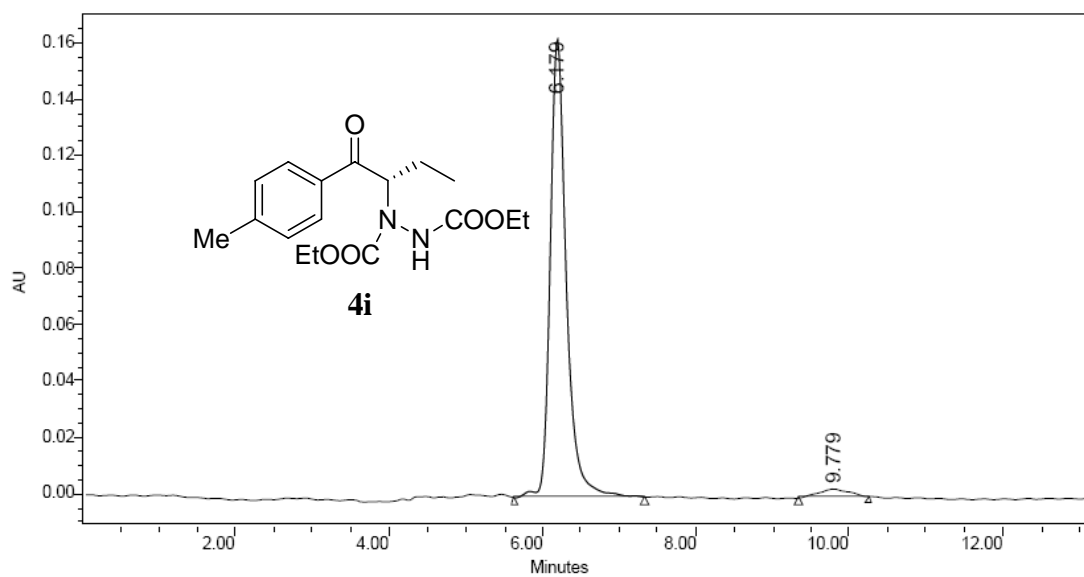

|   | RT<br>(min) | Area<br>(V*sec) | % Area | Height<br>(V) | % Height |
|---|-------------|-----------------|--------|---------------|----------|
| 1 | 6.179       | 2363984         | 98.85  | 162528        | 99.01    |
| 2 | 9.779       | 27474           | 1.15   | 1626          | 0.99     |

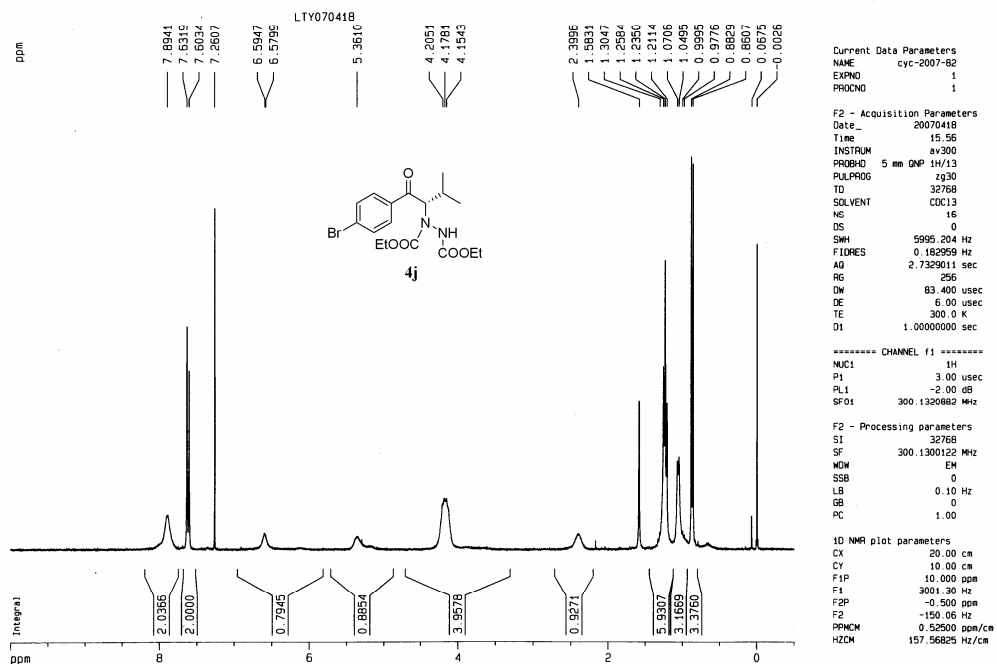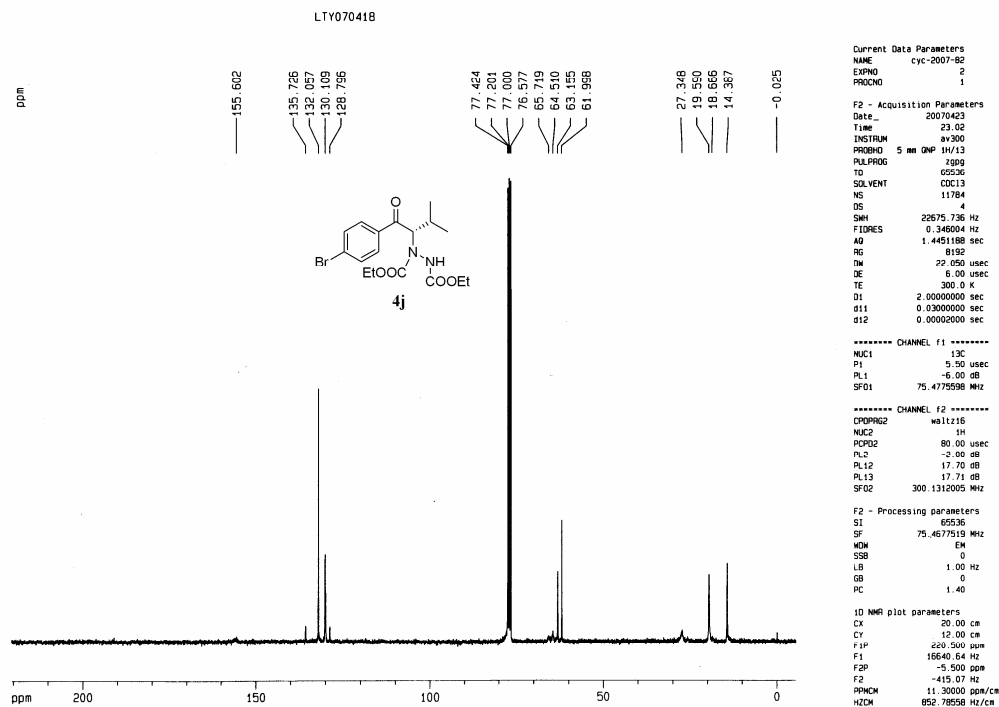

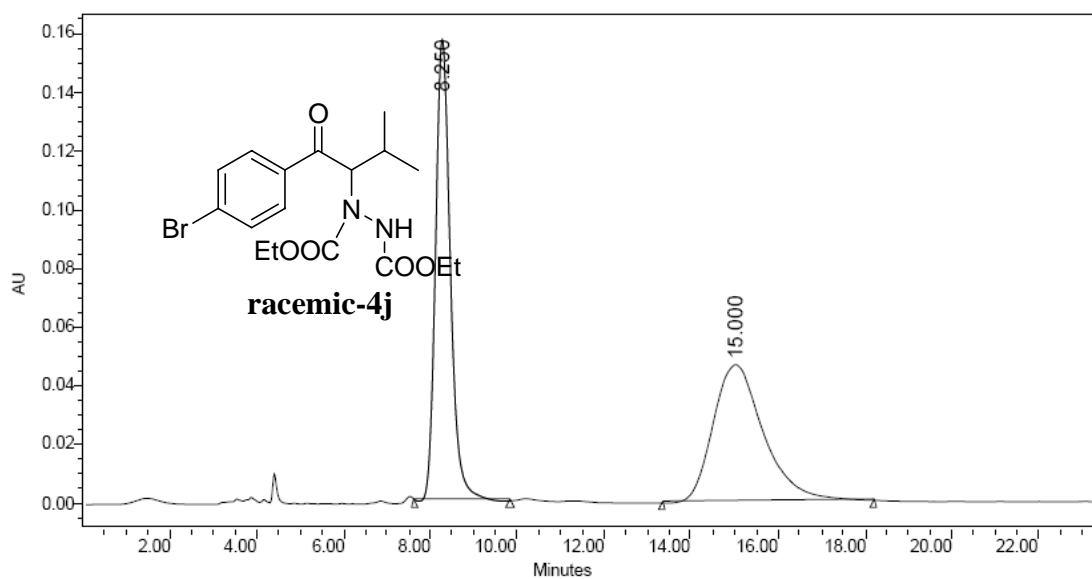

|   | RT<br>(min) | Area<br>( V *sec) | % Area | Height<br>( V ) | %<br>Height |
|---|-------------|-------------------|--------|-----------------|-------------|
| 1 | 8.250       | 3726191           | 49.53  | 156802          | 77.00       |
| 2 | 15.000      | 3797236           | 50.47  | 46833           | 23.00       |

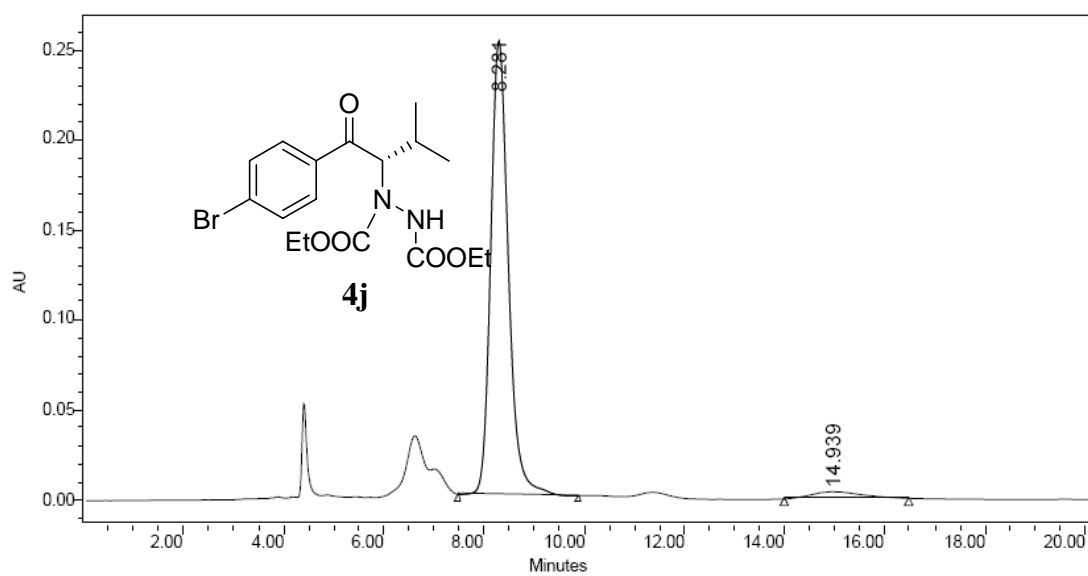

|   | RT<br>(min) | Area<br>( V *sec) | % Area | Height<br>( V ) | %<br>Height |
|---|-------------|-------------------|--------|-----------------|-------------|
| 1 | 8.281       | 6193192           | 98.40  | 252512          | 99.12       |
| 2 | 14.939      | 100970            | 1.60   | 2241            | 0.88        |

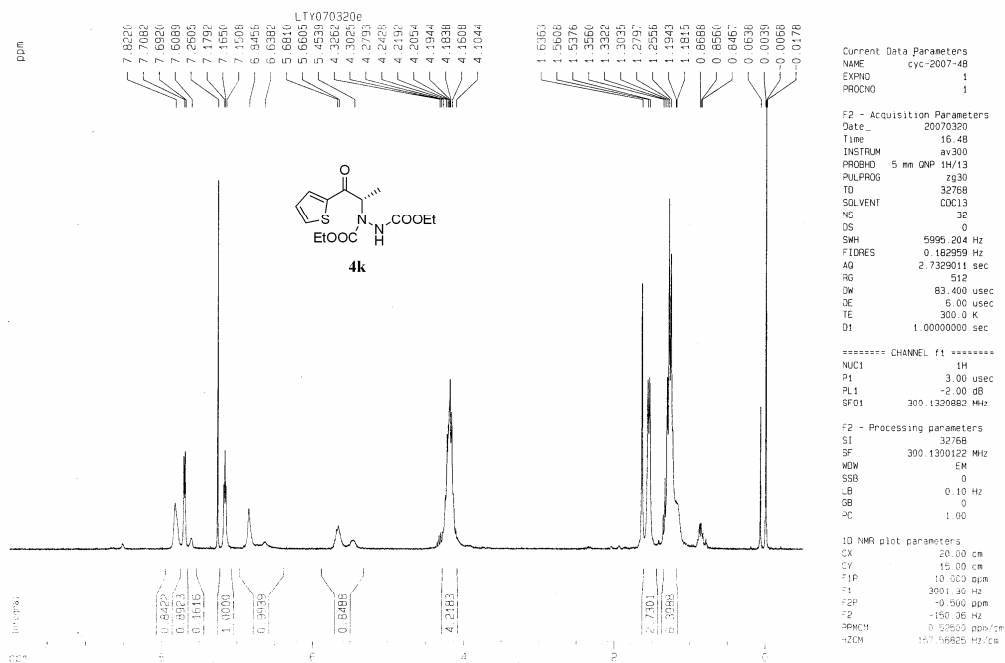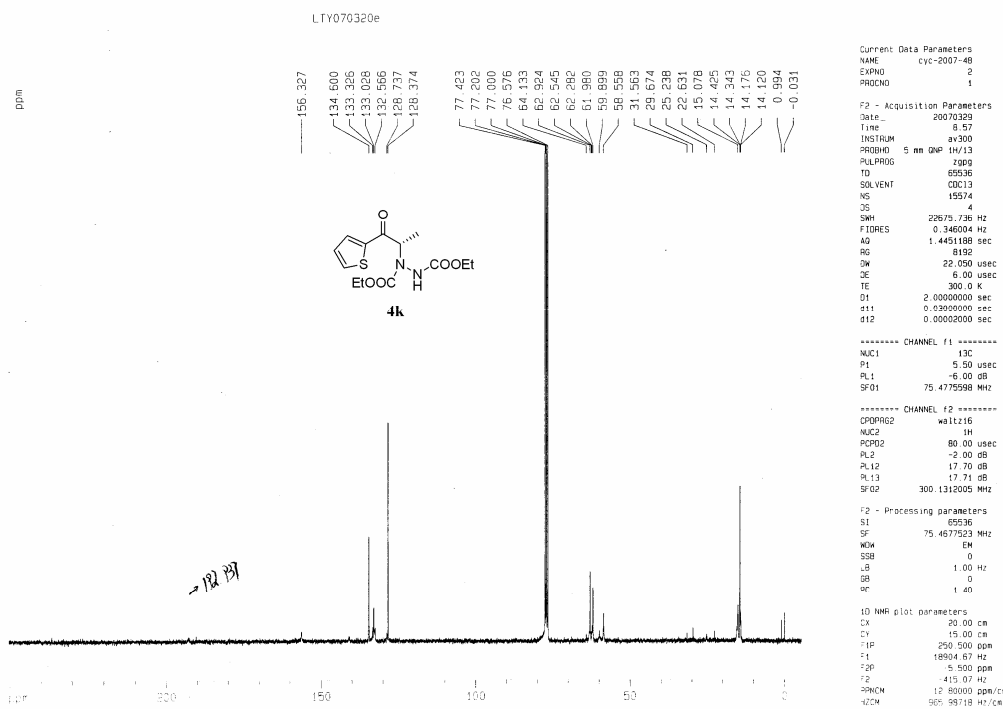

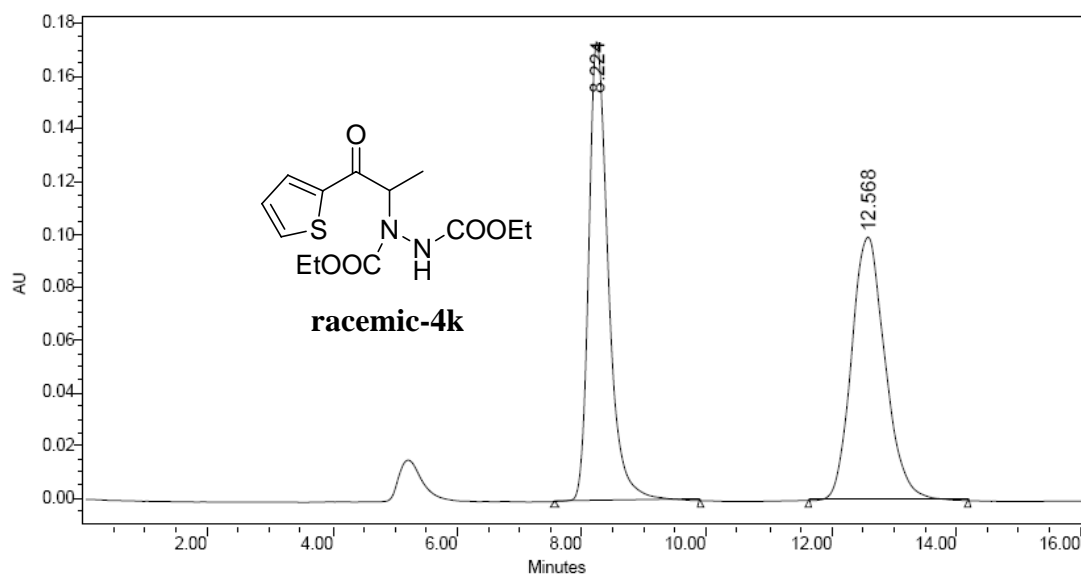

|   | RT<br>(min) | Area<br>( V *sec) | % Area | Height<br>( V ) | %<br>Height |
|---|-------------|-------------------|--------|-----------------|-------------|
| 1 | 8.224       | 3812947           | 50.35  | 174296          | 63.58       |
| 2 | 12.568      | 3759901           | 49.65  | 99845           | 36.42       |

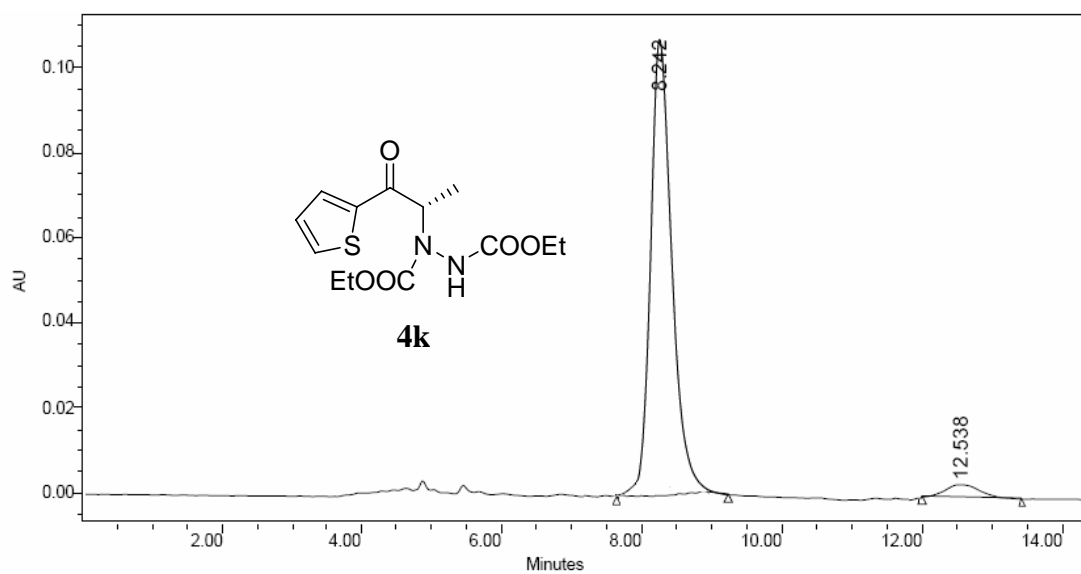

|   | RT<br>(min) | Area<br>( V *sec) | % Area | Height<br>( V ) | %<br>Height |
|---|-------------|-------------------|--------|-----------------|-------------|
| 1 | 8.242       | 2173054           | 97.84  | 105343          | 98.17       |
| 2 | 12.538      | 48030             | 2.16   | 1960            | 1.83        |

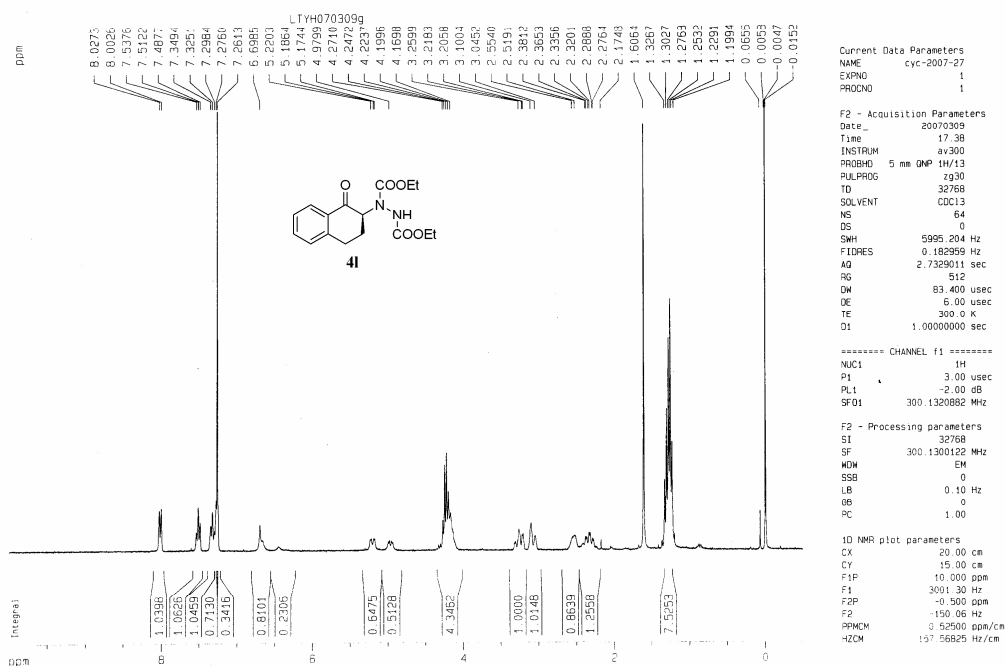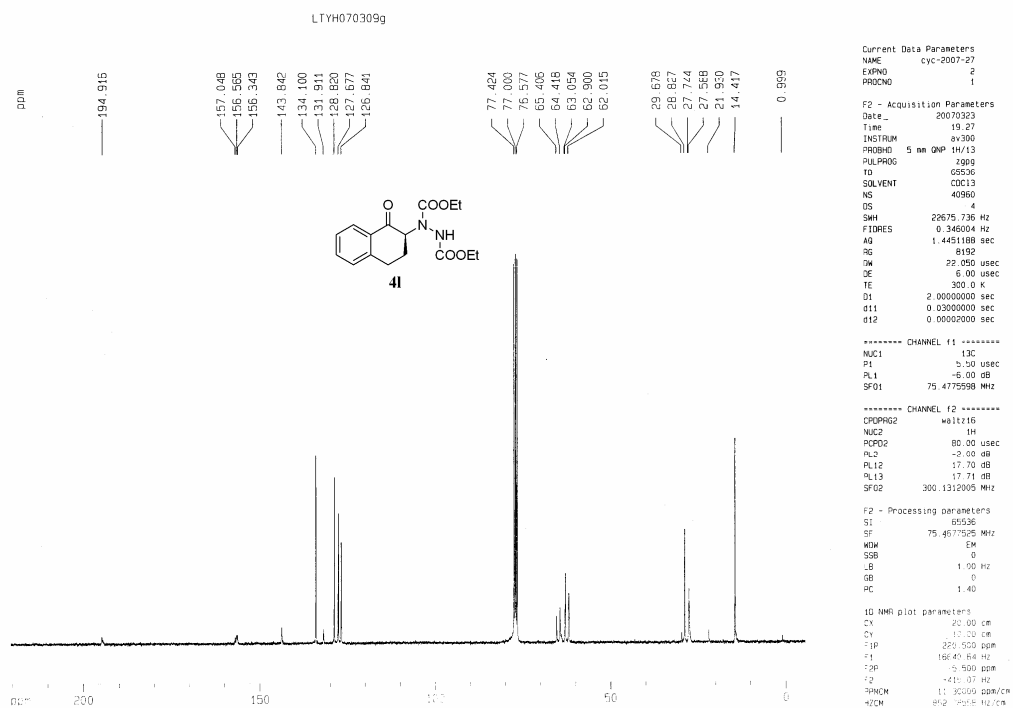

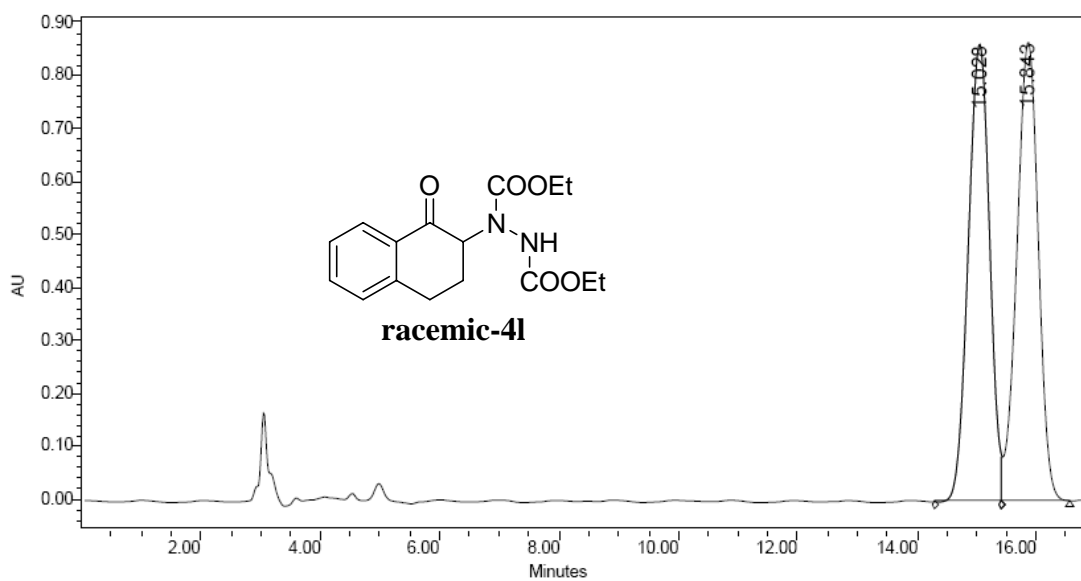

|   | RT<br>(min) | Area<br>( V *sec) | % Area | Height<br>( V ) | %<br>Height |
|---|-------------|-------------------|--------|-----------------|-------------|
| 1 | 15.028      | 21519177          | 49.84  | 863374          | 49.92       |
| 2 | 15.843      | 21661043          | 50.16  | 866244          | 50.08       |

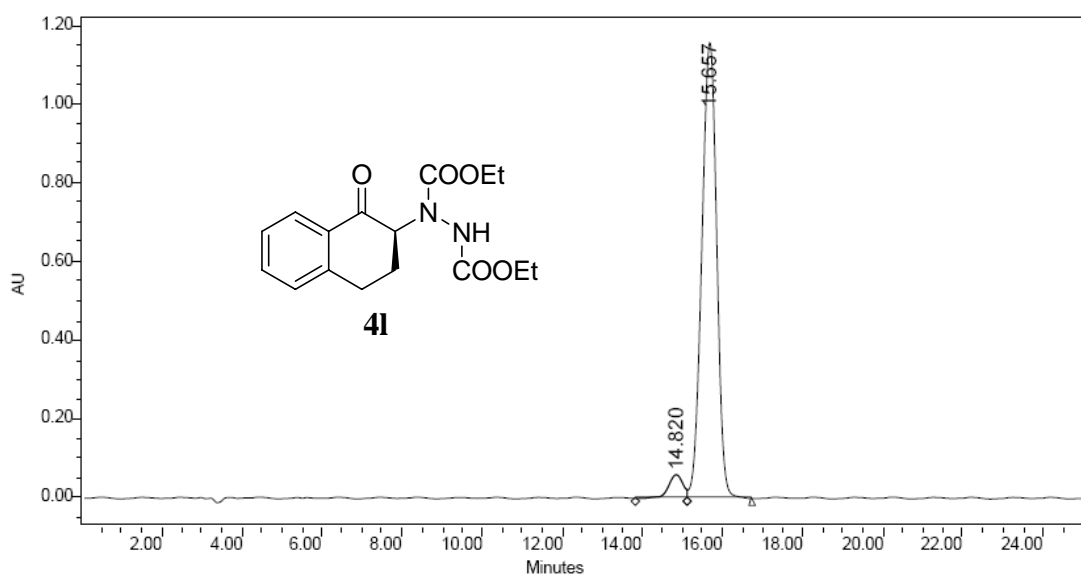

|   | RT<br>(min) | Area<br>( V *sec) | % Area | Height<br>( V ) | %<br>Height |
|---|-------------|-------------------|--------|-----------------|-------------|
| 1 | 14.820      | 1539657           | 4.88   | 60559           | 4.96        |
| 2 | 15.657      | 30027615          | 95.12  | 1161141         | 95.04       |

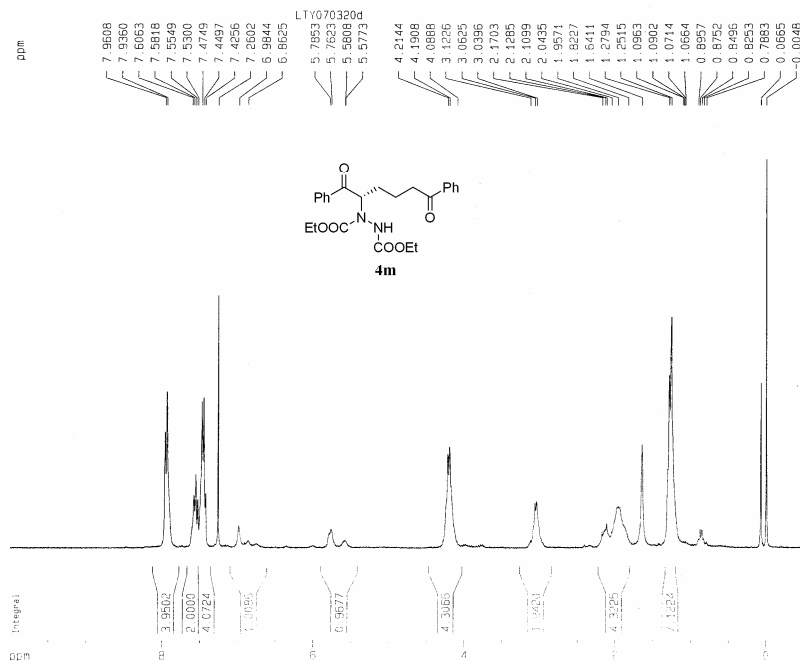

Current Data Parameters  
NAME: cyc-2007-47  
EXPNO: 1  
PROCNO: 1

F2 - Acquisition Parameters  
Date\_: 20070320  
Time: 16.45  
INSTRUM: av300  
PROBHD: 5 mm QNP 1H/13  
PULPROG: zgpg  
TD: 32768  
SOLVENT: CDCl3  
NS: 32  
DS: 0  
SWH: 5995.204 Hz  
FIDRES: 0.182959 Hz  
AQ: 2.7324011 sec  
RG: 512  
OW: 83.400 usec  
DE: 6.00 usec  
TE: 300.0 K  
D1: 1.0000000 sec

\*\*\*\*\* CHANNEL f1 \*\*\*\*\*  
NUC1: 1H  
P1: 3.00 usec  
PL1: -2.00 dB  
SFO1: 300.132052 MHz

F2 - Processing parameters  
SI: 32768  
SF: 300.1300122 MHz  
WDW: EM  
SSB: 0  
LB: 0.10 Hz  
GB: 0  
PC: 1.00

1D NMR plot parameters  
CX: 20.00 cm  
CY: 10.00 cm  
FIP: 10.000 ppm  
F1: 300.130 Hz  
F2: 10.000 Hz  
PPMCH: 15.78625 Hz/cm  
HZCM: 15.78625 Hz/cm

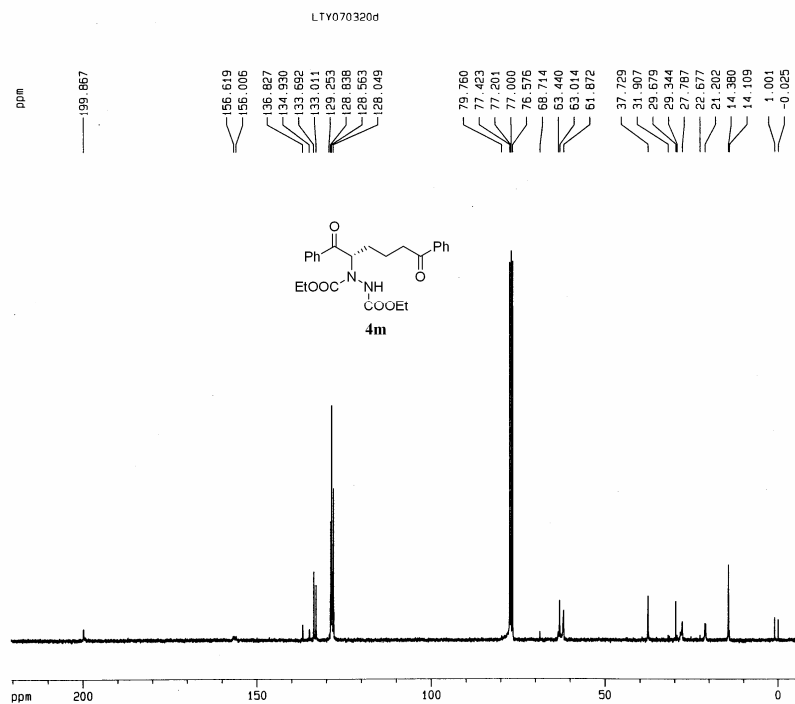

Current Data Parameters  
NAME: cyc-2007-47  
EXPNO: 2  
PROCNO: 1

F2 - Acquisition Parameters  
Date\_: 20070321  
Time: 18.29  
INSTRUM: av300  
PROBHD: 5 mm QNP 1H/13  
PULPROG: zgpg  
TD: 65536  
SOLVENT: CDCl3  
NS: 15196  
DS: 4  
SWH: 22675.736 Hz  
FIDRES: 0.346004 Hz  
AQ: 1.445188 sec  
RG: 8192  
OW: 22.050 usec  
DE: 6.00 usec  
TE: 300.0 K  
D1: 2.0000000 sec  
d11: 0.0300000 sec  
d12: 0.0000200 sec

\*\*\*\*\* CHANNEL f1 \*\*\*\*\*  
NUC1: 13C  
P1: 5.50 usec  
PL1: -6.00 dB  
SFO1: 75.4775598 MHz

\*\*\*\*\* CHANNEL f2 \*\*\*\*\*  
CPDPRG2: waltz16  
NUC2: 1H  
PCPD2: 80.00 usec  
PL2: -2.00 dB  
PL12: 17.70 dB  
PL13: 17.71 dB  
SFO2: 300.1312000 MHz

F2 - Processing parameters  
SI: 65536  
SF: 75.4677528 MHz  
WDW: EM  
SSB: 0  
LB: 1.00 Hz  
GB: 0  
PC: 1.40

1D NMR plot parameters  
CX: 20.00 cm  
CY: 10.00 cm  
FIP: 220.500 ppm  
F1: 16640.64 Hz  
F2: -5.500 ppm  
F2: -415.07 Hz  
PPMCH: 11.30000 ppm/cm  
HZCM: 852.78598 Hz/cm



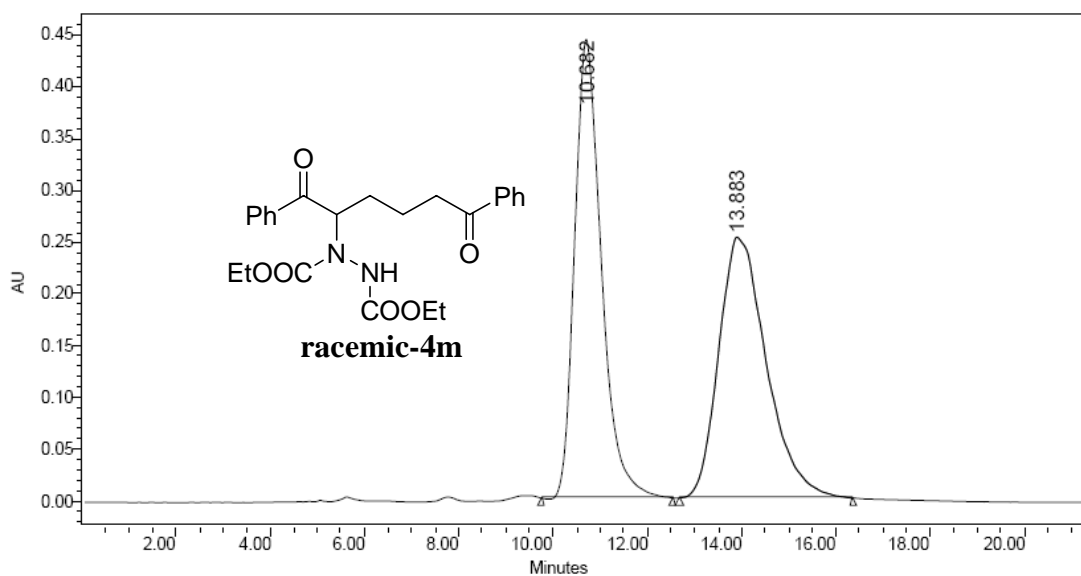

|   | RT<br>(min) | Area<br>( V *sec) | % Area | Height<br>( V ) | % Height |
|---|-------------|-------------------|--------|-----------------|----------|
| 1 | 10.682      | 17460261          | 49.69  | 442360          | 63.75    |
| 2 | 13.883      | 17680757          | 50.31  | 251514          | 36.25    |

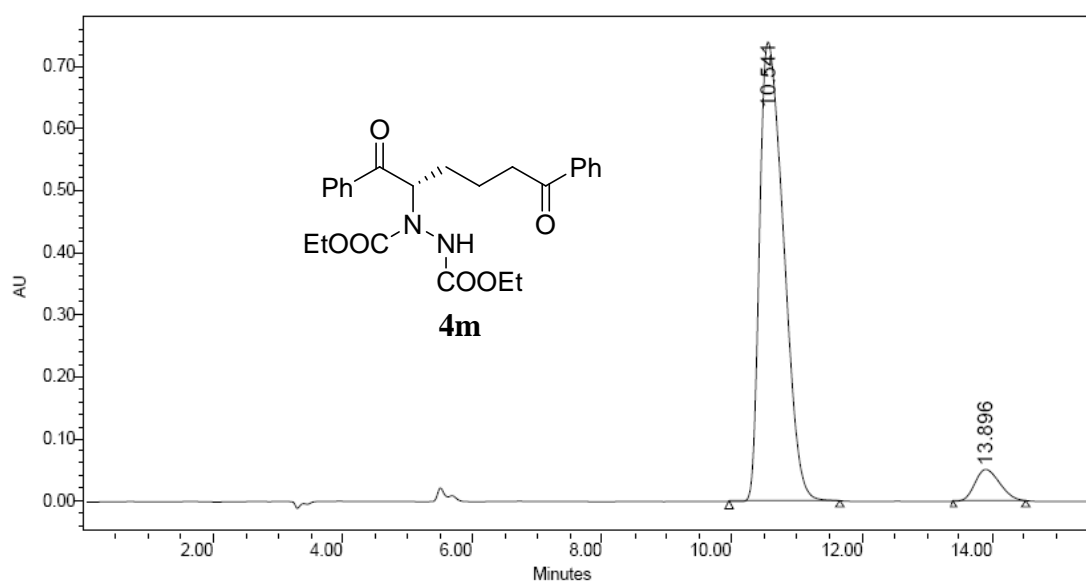

|   | RT<br>(min) | Area<br>( V *sec) | % Area | Height<br>( V ) | % Height |
|---|-------------|-------------------|--------|-----------------|----------|
| 1 | 10.541      | 18963758          | 93.80  | 739957          | 93.78    |
| 2 | 13.896      | 1252773           | 6.20   | 49104           | 6.22     |

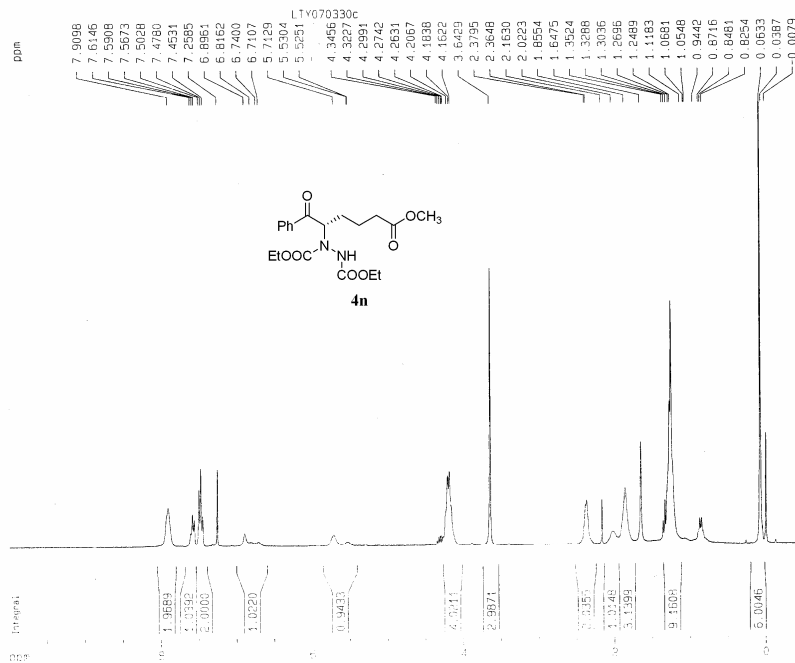

Current Data Parameters  
NAME cyc-2007-66  
EXPNO 1  
PROCNO 1

F2 - Acquisition Parameters  
Date\_ 20070330  
Time 15.55  
INSTRUM av300  
PROBHD 5 mm QNP 1H/13  
PULPROG zg30  
TD 32768  
SOLVENT CDCl<sub>3</sub>  
NS 32  
DS 0  
SWH 5995.204 Hz  
FIDRES 0.182959 Hz  
AQ 2.7329011 sec  
RG 512  
DW 83.400 usec  
DE 6.00 usec  
TE 300.0 K  
D1 1.0000000 sec

\*\*\*\*\* CHANNEL f1 \*\*\*\*\*  
NUC1 1H  
P1 3.00 usec  
PL1 -2.00 dB  
SFO1 300.1320882 MHz

F2 - Processing parameters  
SI 32768  
SF 300.1300122 MHz  
WDW EM  
SSB 0  
LB 0.10 Hz  
GB 0  
PC 1.00

1D NMR plot parameters  
CX 20.00 cm  
CY 18.00 cm  
F1P 10.000 ppm  
F1 3001.30 Hz  
F2P -0.500 ppm  
F2 -150.08 Hz  
RGW 0.02000 ppm/cm  
SCN 151.56825 Hz/cm

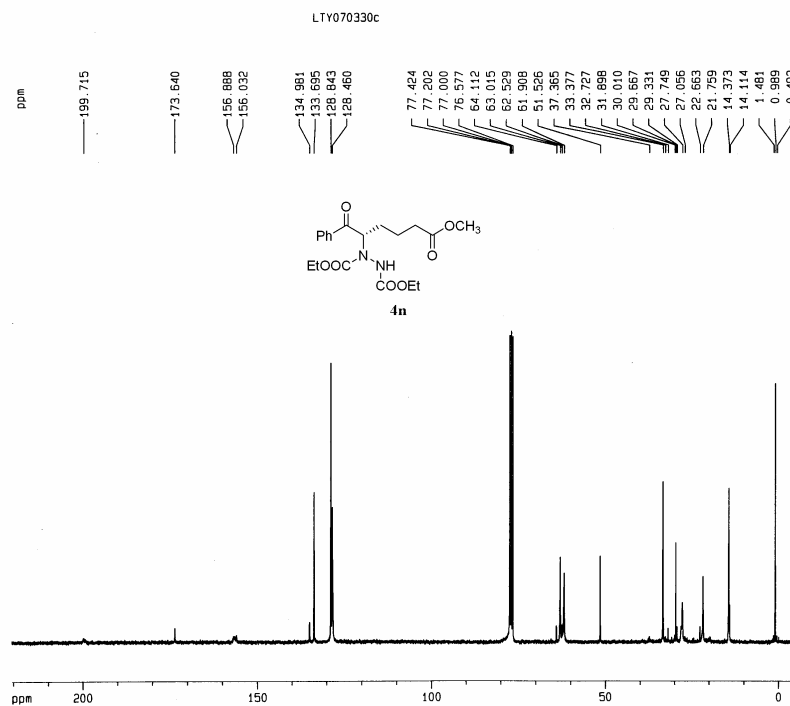

Current Data Parameters  
NAME cyc-2007-66  
EXPNO 2  
PROCNO 1

F2 - Acquisition Parameters  
Date\_ 20070415  
Time 14.58  
INSTRUM av300  
PROBHD 5 mm QNP 1H/13  
PULPROG zgpg  
TD 65536  
SOLVENT CDCl<sub>3</sub>  
NS 18808  
DS 4  
SWH 22675.736 Hz  
FIDRES 0.346004 Hz  
AQ 1.445188 sec  
RG 8192  
DW 22.050 usec  
DE 6.00 usec  
TE 300.0 K  
D1 2.0000000 sec  
d11 0.0300000 sec  
d12 0.0002000 sec

\*\*\*\*\* CHANNEL f1 \*\*\*\*\*  
NUC1 13C  
P1 5.50 usec  
PL1 -6.00 dB  
SFO1 75.4775958 MHz

\*\*\*\*\* CHANNEL f2 \*\*\*\*\*  
CPDPRG2 waltz16  
NUC2 1H  
PCPD2 80.00 usec  
PL2 -2.00 dB  
PL12 17.70 dB  
PL13 17.71 dB  
SFO2 300.1312005 MHz

F2 - Processing parameters  
SI 65536  
SF 75.4677523 MHz  
WDW EM  
SSB 0  
LB 1.00 Hz  
GB 0  
PC 1.40

1D NMR plot parameters  
CX 20.00 cm  
CY 8.00 cm  
F1P 220.500 ppm  
F1 16640.54 Hz  
F2P -5.500 ppm  
F2 -415.07 Hz  
RGW 11.30000 ppm/cm  
H2OM 852.78558 Hz/cm

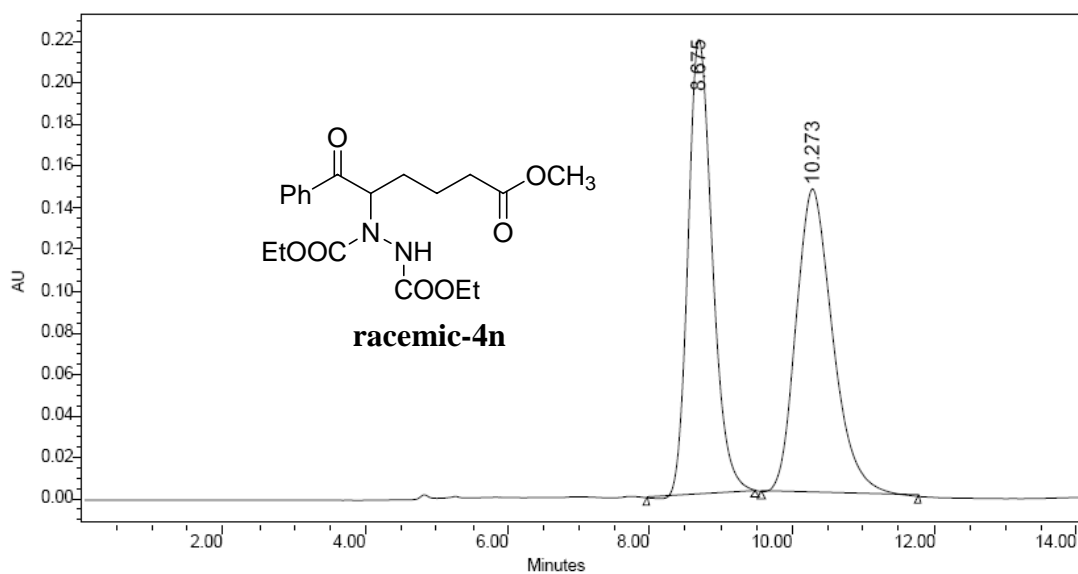

|   | RT<br>(min) | Area<br>( V *sec) | % Area | Height<br>( V ) | %<br>Height |
|---|-------------|-------------------|--------|-----------------|-------------|
| 1 | 8.675       | 5196785           | 49.67  | 218775          | 59.93       |
| 2 | 10.273      | 5265730           | 50.33  | 146257          | 40.07       |

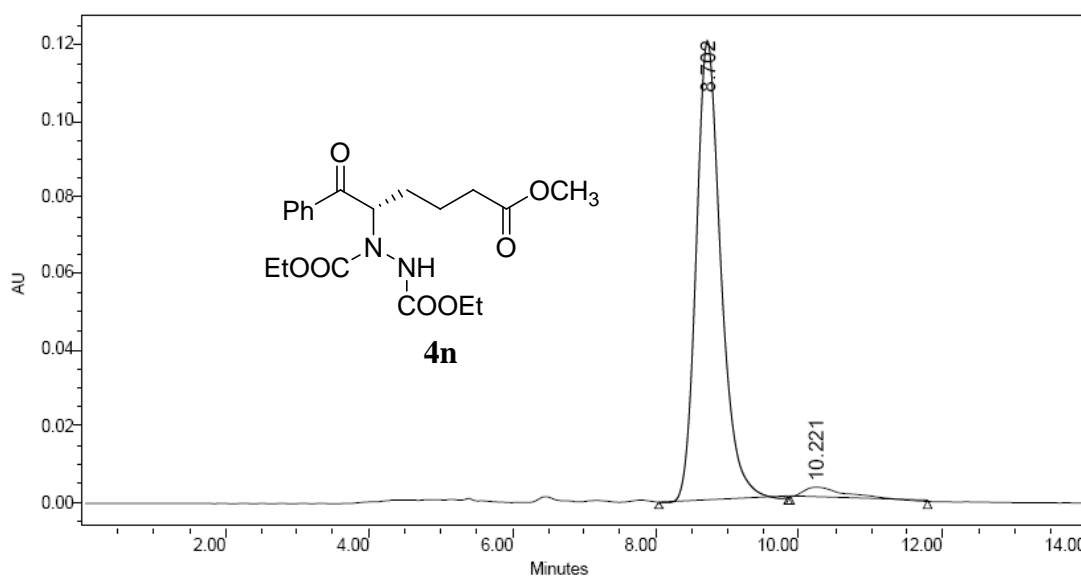

|   | RT<br>(min) | Area<br>( V *sec) | % Area | Height<br>( V ) | %<br>Height |
|---|-------------|-------------------|--------|-----------------|-------------|
| 1 | 8.702       | 2884352           | 97.84  | 120541          | 98.33       |
| 2 | 10.221      | 63605             | 2.16   | 2047            | 1.67        |

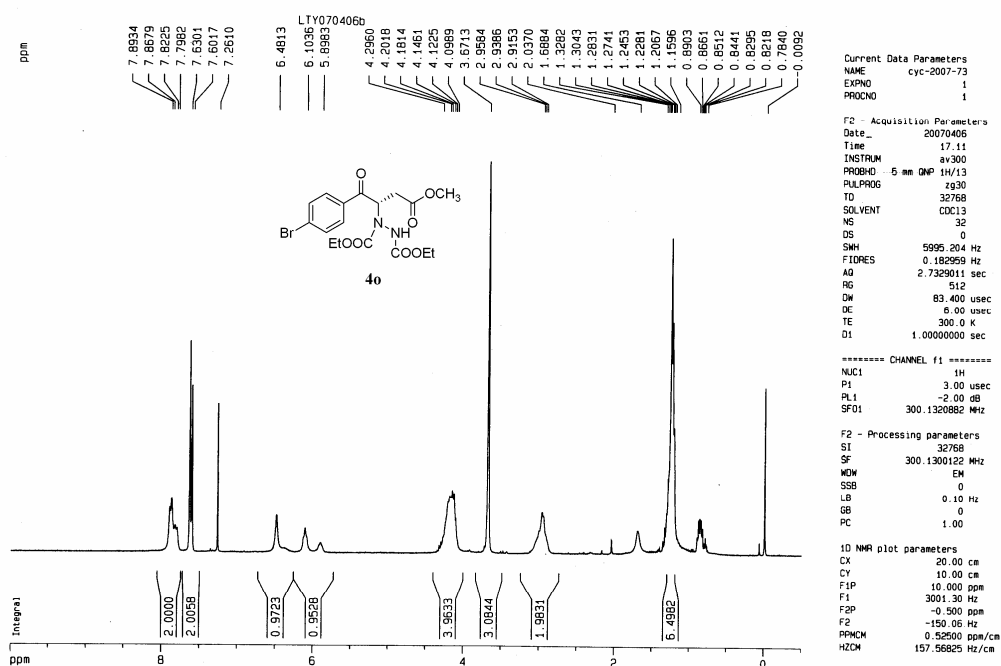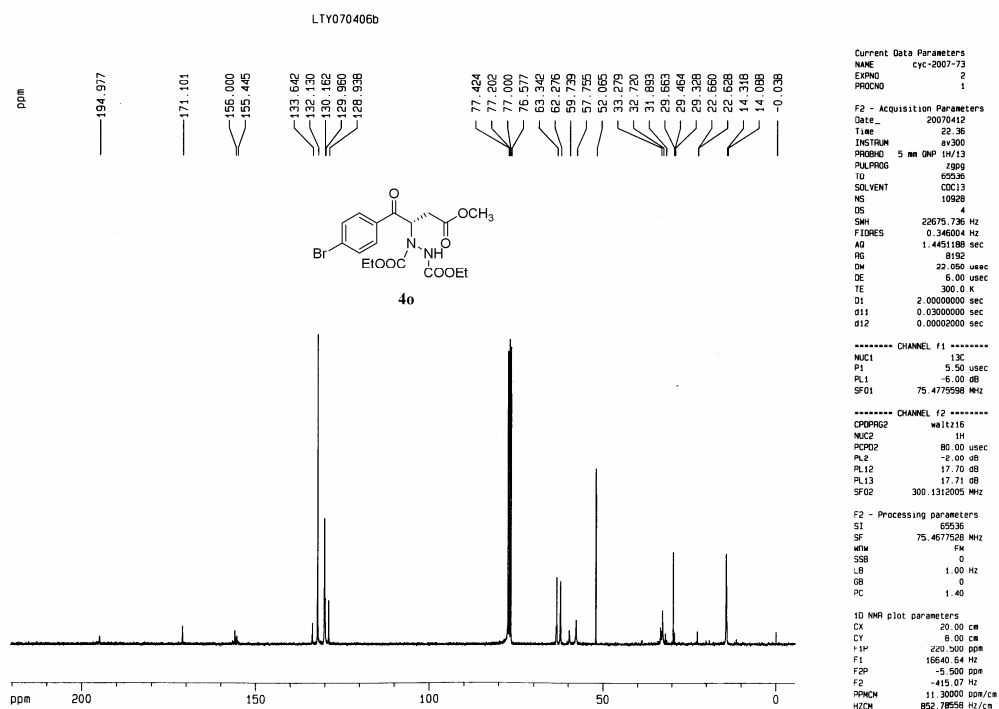

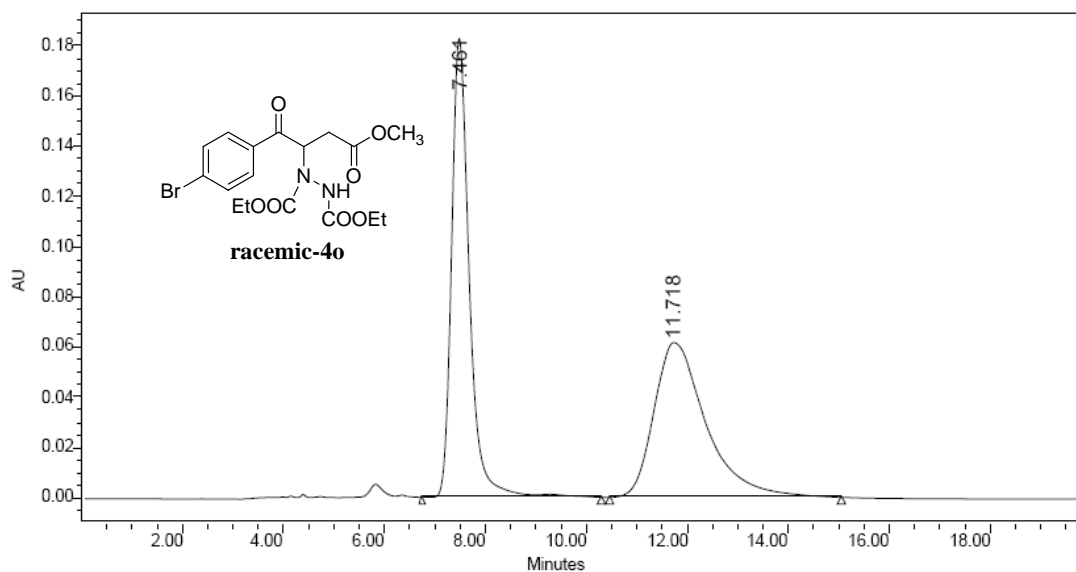

|   | RT<br>(min) | Area<br>( V *sec) | % Area | Height<br>( V ) | %<br>Height |
|---|-------------|-------------------|--------|-----------------|-------------|
| 1 | 7.461       | 4473622           | 50.24  | 182745          | 74.75       |
| 2 | 11.718      | 4431529           | 49.76  | 61720           | 25.25       |

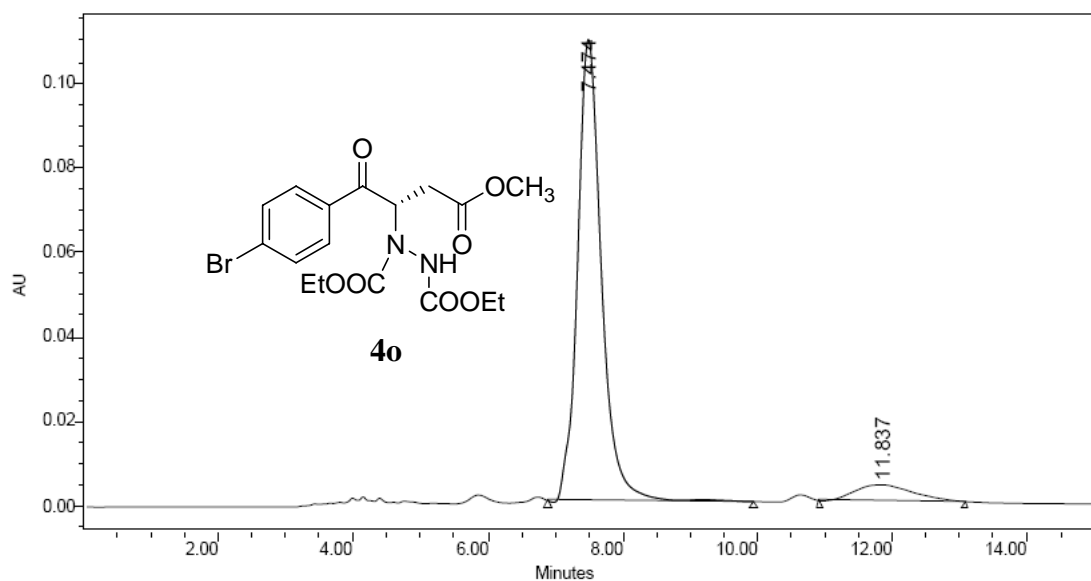

|   | RT<br>(min) | Area<br>( V *sec) | % Area | Height<br>( V ) | %<br>Height |
|---|-------------|-------------------|--------|-----------------|-------------|
| 1 | 7.474       | 2701703           | 95.25  | 109157          | 97.49       |
| 2 | 11.837      | 134644            | 4.75   | 2815            | 2.51        |

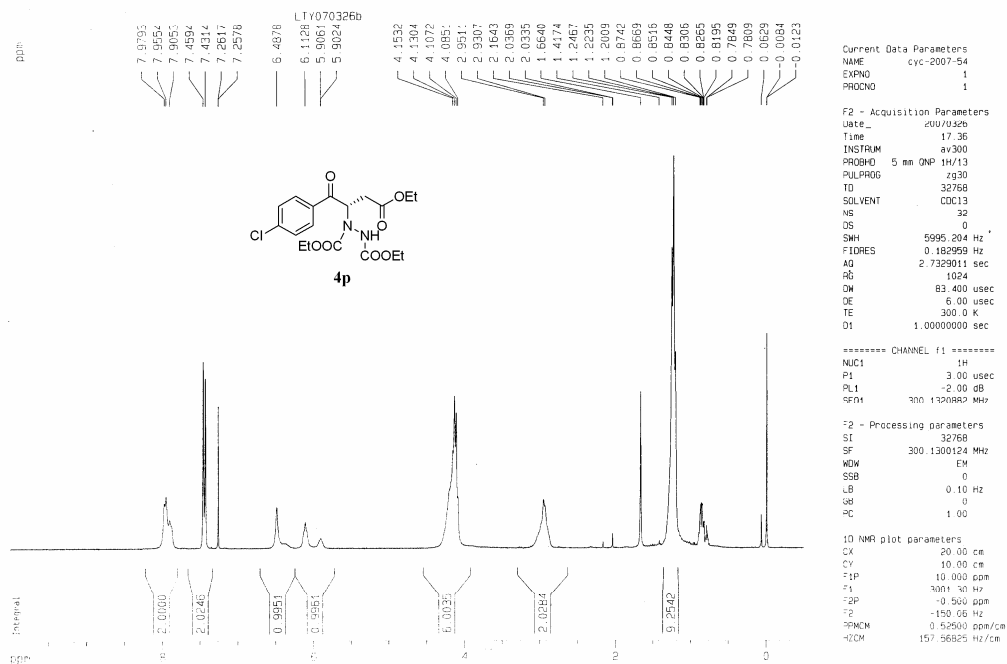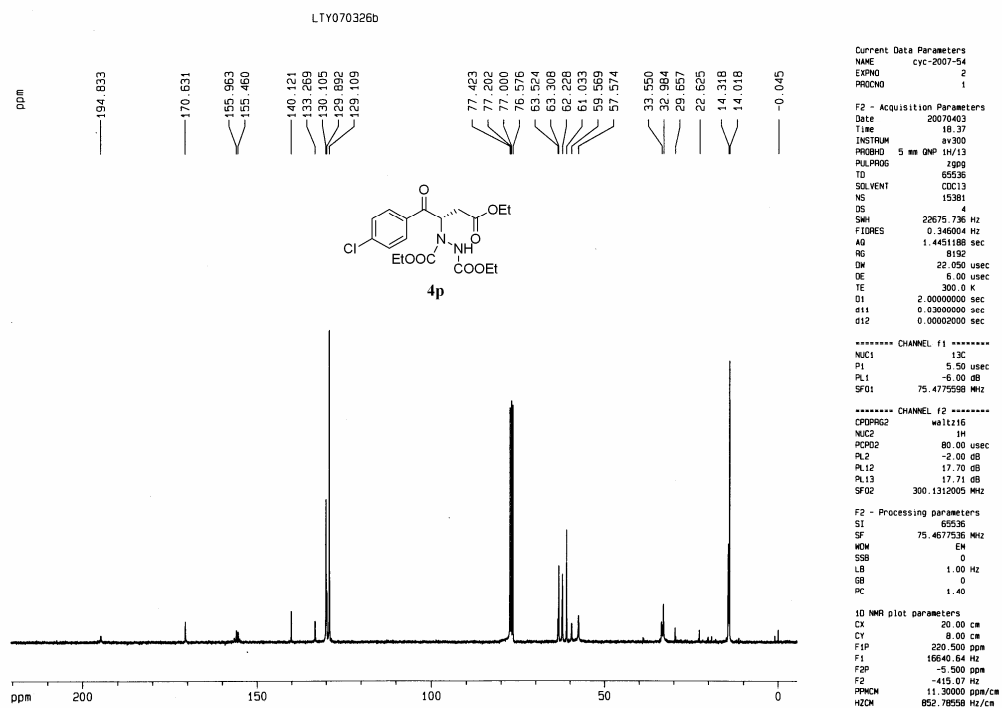

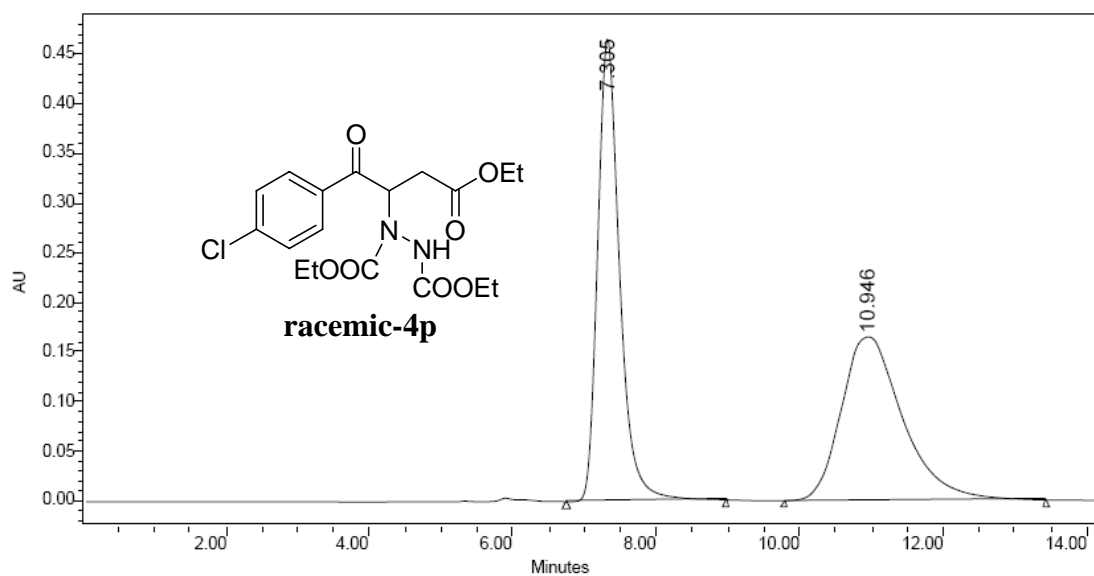

|   | RT<br>(min) | Area<br>( V *sec) | % Area | Height<br>( V ) | %<br>Height |
|---|-------------|-------------------|--------|-----------------|-------------|
| 1 | 7.305       | 9931671           | 50.22  | 465514          | 73.85       |
| 2 | 10.946      | 9845115           | 49.78  | 164820          | 26.15       |

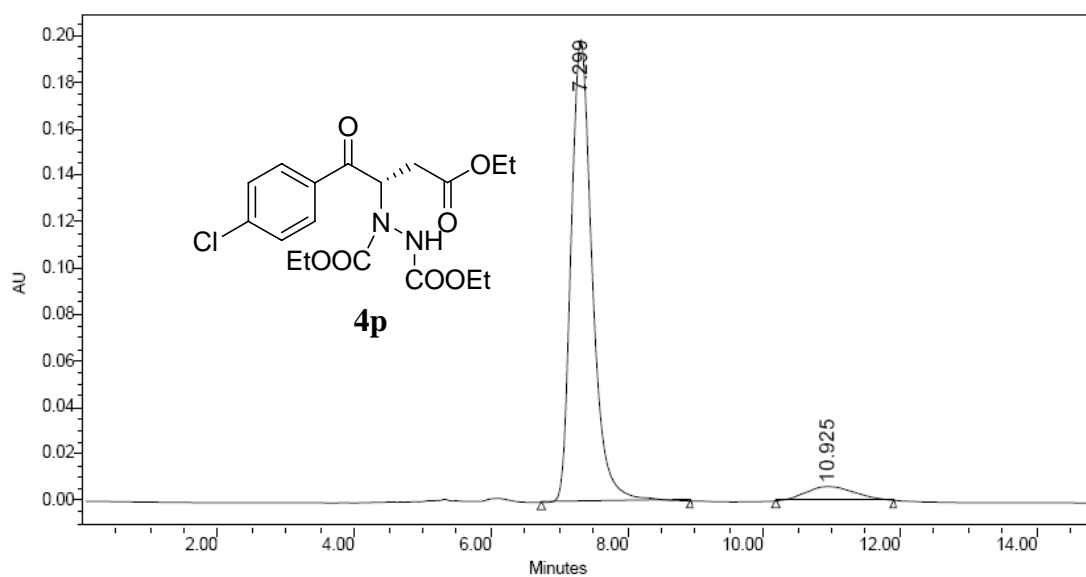

|   | RT<br>(min) | Area<br>( V *sec) | % Area | Height<br>( V ) | %<br>Height |
|---|-------------|-------------------|--------|-----------------|-------------|
| 1 | 7.299       | 4294486           | 95.60  | 198801          | 97.68       |
| 2 | 10.925      | 197481            | 4.40   | 4732            | 2.32        |
